# Supplementary material for: Disentangling bias between Gq, GRK2, and arrestin3 recruitment to the M3 muscarinic acetylcholine receptor
Source: eLife. 2021 Dec 1;10:e58442. doi: 10.7554/eLife.58442 (PMC8635974; doi:10.7554/eLife.58442)
Supplement: Figure 1—figure supplement 4—source data 1. [file elife-58442-fig1-figsupp4-data1.xlsx]

## Sheet: Tabelle1
BRET ratio %( normalized to max response)	Acetylcholine			Arecoline			Guvacoline			Pilocarpine			Methacholine			Furmethiodide			Mda
Log[agonist](M)	Mean	SEM	N	Mean	SEM	N	Mean	SEM	N	Mean	SEM	N	Mean	SEM	N	Mean	SEM	N	Mean	SEM	N
-10	3.96919	1.24299	12	1.46465	0.444311	4	1.97542	0.550478	10				2.10648	0.665282	8	2.32979	0.794757	8	3.86816	1.20241	4
-9.30103	9.99026	0.798662	4				1.76653	1.521	4										4.74354	0.582403	4
-9	19.0679	1.33164	14	2.667	0.821744	7	2.57498	0.540776	13	3.31519	0.746257	7	5.73113	0.375715	8	4.91913	0.763559	8	1.49937	0.823134	6
-8.30103	45.4723	0.947818	12
-8	56.198	1.06026	13	13.2558	0.931112	7	6.68574	0.730075	13	7.37309	0.706296	7	31.9661	1.09323	8	28.8957	0.916779	8	3.12981	0.953999	8
-7.30103	77.5238	0.748325	14
-7	83.1032	0.530878	14	45.1739	0.64281	7	31.8711	1.69231	14	26.7996	0.817109	7	70.8519	1.09352	8	68.686	1.26794	8	7.99543	1.16594	8
-6.30103	93.442	0.792256	3
-6				76.5069	0.845653	9	70.7299	1.78762	14	64.0398	1.64896	7	89.9552	0.927641	8	90.0719	1.16917	8	31.6809	0.933203	10
-5.30103				89.5953	0.42215	5													59.9498	1.00223	6
-5	97.6841	0.736574	12	89.8688	0.90177	9	92.4487	0.749313	8	81.6757	1.01538	7	95.8762	0.515382	8	96.2011	0.979821	8	73.4904	1.22178	8
-4.30103				95.1218	0.983934	5										98.6259	0.512977	8
-4				95.1312	1.24375	6	95.4355	0.912808	14	87.3857	1.5942	7	97.4118	0.504883	8				89.196	1.5737	8
-3.30103							95.7763	0.842087	6	90.9959	1.69533	7
