# Supplementary material for: Disentangling bias between Gq, GRK2, and arrestin3 recruitment to the M3 muscarinic acetylcholine receptor
Source: eLife. 2021 Dec 1;10:e58442. doi: 10.7554/eLife.58442 (PMC8635974; doi:10.7554/eLife.58442)
Supplement: Figure 1—figure supplement 5—source data 1. [file elife-58442-fig1-figsupp5-data1.xlsx]

## Sheet: Tabelle1
% of control specific binding	Acetylcholine			Arecoline			Guvacoline			Pilocarpine			Methacholine			Furmethiodide			Mda
Log[agonist](M)	Mean	SEM	N	Mean	SEM	N	Mean	SEM	N	Mean	SEM	N	Mean	SEM	N	Mean	SEM	N	Mean	SEM	N
-7	87.6	0	2	96.8	1.7	2	97.2	3.35	2	103.5	4.25	2	94.5	0.95	2	93.3	5.65	2	90.6	9.2	2
-6	83	1.6	2	94.9	6.55	2	93.9	5.35	2	75.3	0.8	2	98.3	10.55	2	95.7	12.55	2	86.7	7.95	2
-5.30103	58.3	4.3	2	80.2	7.25	2	80.3	2.7	2	39.8	5.95	2	76.2	7.5	2	74.3	3.2	2	89.2	6.4	2
-5	46.9	0.15	2	75.7	5.5	2	69.4	2.8	2	31.1	1.8	2	60.5	7.65	2	57	3	2	99.5	1.7	2
-4.30103	18.5	1	2	38.4	4.95	2	41.5	0	2	9.8	0.4	2	32.3	0.35	2	29.8	1.5	2	99	3.65	2
-4	14.2	0	2	21.7	0.4	2	30.3	2.1	2	6.4	0.6	2	20	0.6	2	19.7	1.95	2	100.1	9.25	2
-3.60206	6.5	0.75	2	12.4	2.4	2	16.3	0.1	2	3.5	0.05	2	10.6	2.15	2	9.9	2.35	2	97.2	0.45	2
-3.30103	1.9	0.65	2	6.9	2.7	2	7.5	0.9	2	3.8	0.8	2	5.9	0.8	2	6.3	1.65	2	95.6	4.95	2
-3.12494	2.6	1.25	2	6	2.35	2	6.4	0.55	2	5.1	0.65	2	6.3	1.2	2	3.5	0.7	2	95.4	5.15	2
-3	1.7	0.75	2	4.5	2.2	2	3.8	0.85	2	1.9	0.75	2	6.3	2.85	2	1.9	0.7	2	90.1	10.3	2
-2																			93.4	2.1	2
-1.30103																			72.5	0.3	2
