# Supplementary material for: Disentangling bias between Gq, GRK2, and arrestin3 recruitment to the M3 muscarinic acetylcholine receptor
Source: eLife. 2021 Dec 1;10:e58442. doi: 10.7554/eLife.58442 (PMC8635974; doi:10.7554/eLife.58442)
Supplement: Figure 1—source data 1. [file elife-58442-fig1-data1.xlsx]

## Sheet: Tabelle1
Figure 1B: M3R-Gq
	ACh 30 µM	Are 50 µM	Guva 50 µM	Pilo 50 µM	Metha 50 µM	Fur 50 µM	Mda 100 µM
	1	0.228	0.155	0.0353	0.612	0.517	0.025
	1	0.227	0.137	0.0288	0.636	0.679	-0.0418
	1	0.138	0.142	-0.117	0.562	0.58	-0.0533
	1	0.16	0.186	0.0326	0.588	0.58	-0.0341
	1	0.00919	0.189	0.145	0.456	0.563	0.0265
	1	0.119	0.167	0.237	0.644	0.534	0.0758
	1	0.158	0.232	0.11	0.732	0.672	0.131
	1	0.181	0.152	0.0894	0.647	0.6	-0.0104
	1	0.109	0.178	0.158	0.726	0.581	-0.0892
	1	0.225	0.22	0.0586	0.617	0.63	0.104
	1	0.224	0.236	0.0941	0.619	0.662	0.11
	1	0.2	0.214	0.0778	0.662	0.708	0.0741
Mean	1	0.164849	0.184	0.0791333	0.625083	0.608833	0.0264667
SD	0	0.0623875	0.0334116	0.0828021	0.0696138	0.0582177	0.0695525
