# Supplementary material for: Disentangling bias between Gq, GRK2, and arrestin3 recruitment to the M3 muscarinic acetylcholine receptor
Source: eLife. 2021 Dec 1;10:e58442. doi: 10.7554/eLife.58442 (PMC8635974; doi:10.7554/eLife.58442)
Supplement: Figure 2—figure supplement 1—source data 1. [file elife-58442-fig2-figsupp1-data1.xlsx]

## Sheet: Tabelle1
Figure 2 - Figure supplement 1B
ACh 30µM			Arecoline 50µM			Guvacoline 50µM			Pilocarpine 50µM			Methacholine 50µM			Furmethiodide 50µM			Mda 100µM
Mean	SD	N	Mean	SD	N	Mean	SD	N	Mean	SD	N	Mean	SD	N	Mean	SD	N	Mean	SD	N
1	0	6	0.735577	0.0476283	6	0.731465	0.0904951	5	0.489348	0.0985227	6	0.87205	0.078082	5	0.874877	0.0421357	5	0.632343	0.105969	6
Figure 2 - Figure supplement 1D
time	w/o PTX						PTX
0.704	-8.65e-05	4.84e-05	-0.000291	-2.39e-05	0.000158	-0.000375	0.000424	0.00102	0.000784	9.37e-05	0.00129	0.00121
1.277	-0.000284	0.000121	0.000361	-0.000351	-0.000229	0.000115	-3.77e-05	-0.000194	0.000457	7.79e-05	0.00139	-0.000252
1.708	-0.000802	-0.0004	0.000624	0.000426	0.000617	-0.000124	0.000106	0.000107	0.000851	0.000558	0.00156	0.000569
2.21	0.000272	0.000129	0.00055	-0.000469	0.000502	-0.000256	0.000175	-4.59e-05	0.000418	0.000102	0.00132	-0.000197
2.709	-0.00114	-6.77e-05	0.00044	-0.000701	0.000938	0.000344	4.4e-05	-0.000282	5.4e-05	0.000559	0.00107	-0.000184
3.209	-0.000357	-0.000175	0.000184	-0.000528	0.00044	0.00054	-0.000185	0.00122	0.000142	-0.000146	0.00192	0.000746
3.712	-2.29e-05	-3.96e-05	-0.000286	-0.000396	0.00037	0.000109	0.000127	0.000296	0.000306	0.000314	0.00188	3.73e-05
4.21	-0.000247	0.000797	0.000202	-0.000157	-0.000326	0.000667	0.000106	0.000102	0.000347	0.0009	0.00134	0.000279
4.708	-0.00025	-0.000171	0.000184	-0.000193	0.00054	1.44e-05	0.000774	4.8e-05	0.00057	0.000298	0.000298	0.000235
5.21	-8.69e-05	-0.000878	4.13e-05	0.000222	0.000212	0.000522	-0.000372	0.000265	-0.000503	-0.000415	0.00125	-0.000107
5.709	-0.000404	-0.000374	0.000134	-0.000539	0.000721	-0.000167	0.000651	0.000776	-0.000144	0.000669	0.00191	0.00114
6.222	-0.000395	9.04e-05	0.000151	-0.000493	0.000674	-9.98e-05	0.000117	-0.00039	-0.000337	-0.000508	0.00163	0.0011
6.709	5.54e-06	6.35e-06	-0.000195	-0.000245	0.000166	-4.2e-05	0.000122	0.000673	0.00056	0.000409	0.000981	0.000749
7.21	-0.000807	0.000403	-0.000377	-0.000242	0.000788	-9.7e-05	0.000124	0.00052	0.00044	6.16e-06	0.000816	0.000511
7.708	-0.000318	-0.000321	-0.000318	-0.00038	-0.000458	-0.000201	0.000174	-0.000734	0.000762	0.000237	0.00188	0.0011
8.213	-0.000219	0.000244	-0.000544	-0.000878	3.99e-05	-0.000689	9e-06	0.000629	0.000752	0.00091	0.00139	-0.000149
8.709	0.000322	0.000471	-0.000178	-0.000451	0.000109	-0.00045	-8.19e-06	9.63e-05	0.000401	0.000362	0.00126	0.000556
9.21	5.83e-05	0.000146	-2.65e-05	9.8e-05	-0.000233	0.000145	0.000399	0.000251	0.000965	0.000563	0.00171	0.000293
9.709	9.44e-05	0.000203	-9.83e-05	-0.001	0.000156	-0.000139	-0.000103	-5.41e-05	0.00144	0.000532	0.00126	-0.000611
10.215	-0.00028	-0.000229	-0.000205	-0.00012	-0.000417	-0.000435	0.000321	0.000396	0.000843	0.000443	0.00106	-6.09e-07
10.712	0.000406	0.000686	-0.000183	0.000587	0.00047	-0.000432	0.000269	0.000288	0.000754	-0.000588	0.00133	-0.000343
11.212	0.000971	0.000207	-0.000612	-0.000216	-0.000228	-0.000247	9.88e-05	0.00037	0.000386	-0.000351	0.0008	-0.000881
11.709	-0.000284	-0.000175	-0.000236	-0.00106	4.93e-05	-0.000416	0.00075	0.000387	0.00101	0.00098	0.00109	-8.4e-06
12.21	-0.000687	0.000359	-0.000233	-0.00122	-3.79e-05	-0.00026	0.000709	0.00066	0.000666	-6.78e-05	0.00109	-0.000618
12.709	-8.23e-05	-0.000257	2.58e-05	-0.000208	0.000142	-0.000389	-0.000189	0.000316	0.00103	0.000484	0.000927	0.000747
13.21	-0.000916	-0.000674	3.51e-05	-0.000996	0.000118	-0.000156	0.000899	0.000198	0.000608	-0.000329	0.00106	-0.000185
13.709	-0.000528	0.000636	-0.000698	-0.000516	7.5e-05	-0.000996	0.000549	-0.000221	0.000781	0.000603	0.00067	0.000156
14.21	0.000714	-0.000153	-0.000182	-0.000449	0.000386	-6.04e-05	0.000109	0.00107	0.000396	-6.8e-05	0.00131	-0.00116
14.713	4.88e-06	0.000985	-0.000452	-0.000341	7.41e-05	0.000333	0.000467	-0.000188	0.000692	0.000521	0.000986	-0.000784
15.21	-0.000453	0.000146	-9.32e-05	0.000115	0.000362	0.000222	0.000574	-0.000128	0.000234	0.000817	0.000617	3.72e-05
15.709	-0.00126	6.56e-05	-4.91e-05	-0.00011	4.89e-05	-0.000137	0.000525	0.000771	0.000631	4.28e-05	0.00107	-0.000955
16.224	0.000219	0.000219	-0.000465	0.000126	7.37e-05	-0.000318	-0.000103	-1.24e-05	0.000724	0.000386	0.0015	0.000212
16.714	-0.000261	-0.00038	-0.000567	-0.00027	0.000178	0.000173	0.000208	-0.000212	0.000414	0.000444	0.00151	0.000202
17.209	3.67e-05	-0.000733	-0.000602	-0.000229	-0.000585	0.000317	-0.000222	1.6e-05	0.000711	-0.000247	0.000731	0.000574
17.708	0.00024	-0.000347	-0.00111	-0.000358	0.000173	0.000522	7.72e-05	0.000601	0.0001	9.75e-05	0.000574	-0.000156
18.21	-7.41e-05	0.000424	5.16e-06	8.91e-05	1.33e-05	-0.000131	0.000722	-5.03e-06	0.000476	0.000322	0.000656	-0.000606
18.708	-0.000217	-0.000753	-0.000574	-0.000652	0.000424	6.44e-05	-4.51e-05	-9.65e-05	0.000209	0.000321	0.000395	-0.000269
19.209	0.000115	0.000174	-0.000591	9.37e-05	-4.67e-05	-0.00018	0.000424	0.000434	4.33e-06	0.000593	0.00097	-0.000396
19.712	0.000578	-0.00055	-0.000255	0.000335	0.000146	0.000529	-2.72e-05	-0.000322	-7.79e-05	0.000152	0.000578	0.00113
20.209	0.00105	-5.41e-05	6.26e-05	-0.000165	-0.000196	-0.000205	0.00077	-0.000109	0.000218	0.000309	0.000803	0.000476
20.708	-0.000416	0.00115	0.000236	0.000313	4.34e-05	-0.000354	-0.000315	0.000192	-0.000714	0.00044	0.00109	0.000185
21.21	0.000271	-0.000496	0.000565	-1.29e-05	1.92e-06	0.00104	-0.000333	0.000322	-4.96e-05	0.000781	0.000265	0.000619
21.71	0.000308	0.000587	0.00208	0.00216	-0.000164	0.00417	0.000227	0.000139	-0.000103	0.000244	0.000743	0.00112
22.209	0.00275	0.00149	0.00418	0.00451	3.8e-06	0.00648	1.31e-05	-0.000685	-0.000147	0.000425	3.43e-05	-0.000491
22.709	0.00406	0.00196	0.00744	0.00846	0.00224	0.01043	-0.000263	-4.58e-05	0.000139	0.000365	0.000766	0.00149
23.209	0.00482	0.00372	0.00939	0.0109	0.0046	0.01201	8.01e-05	0.000214	-0.00037	0.000185	3e-06	-0.00045
23.712	0.00604	0.00481	0.01123	0.01372	0.00634	0.01364	-0.000356	0.000155	-0.000841	0.000203	-0.000174	-0.0003
24.21	0.00705	0.00684	0.01346	0.01632	0.00811	0.01511	-0.000622	-0.000471	-0.00109	0.000716	0.000653	0.000956
24.717	0.00814	0.00866	0.01498	0.01808	0.00927	0.01652	-0.000273	-0.00025	-0.00136	0.000153	-0.000306	0.000882
25.21	0.00949	0.0095	0.01567	0.02006	0.01141	0.01639	0.000214	-0.000439	-0.00144	-1.97e-05	-0.000412	-0.000431
25.709	0.01026	0.01118	0.01638	0.02179	0.01286	0.0173	-0.000573	-0.00093	-0.001	8.61e-05	-0.000271	0.000444
26.209	0.0113	0.01092	0.01667	0.02336	0.01334	0.01763	-0.00062	-0.000636	-0.000952	0.000376	-0.000526	-0.000567
26.718	0.01135	0.01339	0.01736	0.02476	0.0141	0.01769	-0.000289	0.000208	-0.000878	0.000159	-0.000646	0.000595
27.214	0.01322	0.01377	0.01798	0.02498	0.01455	0.01795	-6.83e-05	-0.000435	-0.000721	-0.000562	-0.000205	-0.00174
27.734	0.0136	0.01489	0.01828	0.0269	0.01607	0.0186	-0.000874	-6.2e-06	-0.000722	-0.0009	-0.000778	-6.07e-06
28.21	0.01424	0.01602	0.01924	0.02778	0.0159	0.01826	-0.000122	-0.000228	-0.000963	0.000227	-0.000618	-8.16e-05
28.711	0.01439	0.01621	0.01917	0.02898	0.01651	0.01791	-0.000855	8.6e-05	-0.00118	0.000386	-0.000945	-0.000507
29.21	0.01587	0.01685	0.01879	0.02925	0.01683	0.01805	-0.00106	9.25e-06	-0.000701	-0.00035	-0.00055	-0.00121
29.716	0.01588	0.01731	0.01918	0.03012	0.01758	0.01796	-0.000296	-0.000165	-0.000555	-0.000445	-0.00049	-0.000918
30.211	0.01646	0.01854	0.01942	0.03083	0.01753	0.01807	-0.00104	0.000128	-0.00156	0.000585	-0.0014	-2.57e-05
30.709	0.01643	0.01927	0.01959	0.032	0.01759	0.01846	-0.00035	-0.000545	-0.00139	-0.000162	-0.000473	-0.000442
31.216	0.01786	0.02051	0.01942	0.03193	0.01825	0.01857	-0.00108	-2.56e-06	-0.00136	0.00012	-0.00117	-0.000184
31.709	0.01882	0.02035	0.01974	0.03267	0.01895	0.01803	-0.000714	0.000195	-0.00148	-9.57e-05	-0.00161	-0.00072
32.21	0.01811	0.02092	0.01971	0.03352	0.01928	0.01873	-0.00109	0.000128	-0.00188	0.000285	-0.000127	6.81e-05
32.709	0.01728	0.02089	0.01954	0.03407	0.01909	0.01856	-0.000971	0.000256	-0.0015	-0.000234	-0.00134	-0.00121
33.21	0.01741	0.02033	0.02054	0.0342	0.01865	0.01787	-0.000804	-0.000507	-0.000731	4.8e-05	-0.000666	-0.000119
33.709	0.01915	0.02156	0.01993	0.03546	0.01885	0.01831	-0.000675	-0.000881	-0.00173	-0.000533	-0.0013	-0.00115
34.214	0.02036	0.02208	0.02004	0.03456	0.01943	0.01788	-0.000914	-0.00076	-0.0011	-0.000301	-0.000823	-0.000845
34.709	0.01989	0.02201	0.0205	0.03552	0.01924	0.01819	-0.000987	-0.000444	-0.00149	-2.96e-05	-0.00103	-0.00085
35.211	0.02055	0.02117	0.01946	0.03574	0.01921	0.01853	-0.000666	-0.000405	-0.00134	-0.00135	-0.00122	0.00098
35.709	0.02102	0.02237	0.02097	0.03653	0.01968	0.01831	-0.0016	-0.000239	-0.00156	-0.000315	-0.00108	-0.001
36.21	0.02039	0.02326	0.02064	0.0367	0.01883	0.01866	-0.00063	-0.000862	-0.00164	-0.000402	-0.000729	-0.000591
36.71	0.02055	0.02323	0.02015	0.03628	0.01963	0.01796	-0.000951	0.000278	-0.00149	-0.000101	-0.000955	-0.00044
37.21	0.0203	0.02267	0.02064	0.03712	0.01956	0.01729	-0.000939	-0.000804	-0.00139	-0.000149	-0.000966	-0.00015
37.712	0.02189	0.02366	0.0207	0.03728	0.01947	0.01801	-0.00122	-0.000482	-0.00191	-0.00114	-0.00119	-7.96e-05
38.211	0.02071	0.02289	0.02098	0.0371	0.02005	0.0177	-0.00107	-0.000234	-0.0018	-0.000213	-0.00176	2.53e-05
38.709	0.02126	0.02355	0.02054	0.03661	0.01999	0.01779	-0.00098	-0.00127	-0.00161	-0.0006	-0.00133	-0.000961
39.215	0.02154	0.02336	0.02141	0.03731	0.02029	0.01803	-0.00123	-0.000404	-0.00142	-0.000231	-0.00144	-0.000364
39.71	0.02252	0.02414	0.02086	0.03816	0.01953	0.01854	-0.000389	-0.000395	-0.0016	-0.00118	-0.00183	-0.000911
40.211	0.02204	0.02411	0.02117	0.03723	0.01936	0.01887	-0.00103	-0.000361	-0.00165	-0.000317	-0.00185	-0.000396
40.71	0.02258	0.02361	0.02037	0.03753	0.01891	0.01826	-0.000967	-0.000397	-0.00173	-0.000401	-0.00161	-0.000866
41.211	0.02197	0.02398	0.02015	0.03744	0.01945	0.01796	-0.00107	-0.000802	-0.00178	-0.000467	-0.00232	-0.000254
41.71	0.02152	0.0243	0.02041	0.03762	0.01907	0.01879	-0.000945	-0.000671	-0.00164	-0.000329	-0.00152	-0.00144
42.21	0.02171	0.0242	0.01983	0.03839	0.0198	0.01823	-0.00149	-0.000865	-0.00153	-0.000908	-0.00209	-0.00083
42.71	0.02265	0.02432	0.02112	0.03776	0.01913	0.01826	-0.000954	-0.000442	-0.00175	-4.2e-05	-0.00249	-0.000865
43.212	0.02159	0.02421	0.01979	0.03839	0.01933	0.01852	-0.000947	-0.00107	-0.0017	2.22e-05	-0.00202	-0.000285
43.718	0.02297	0.02408	0.01975	0.03817	0.01944	0.01837	-0.000616	-0.00105	-0.00151	-5.22e-05	-0.00288	-0.00149
44.21	0.02284	0.02355	0.02069	0.03899	0.01915	0.01823	-0.00169	-2.36e-05	-0.00144	-0.000854	-0.00262	-0.000628
44.709	0.02272	0.02406	0.02016	0.03872	0.01907	0.01808	-0.00144	-0.000604	-0.00188	-0.000612	-0.00171	-0.000167
45.213	0.02228	0.02487	0.02022	0.03899	0.0193	0.01865	-0.00129	-0.000791	-0.00222	-0.000146	-0.0024	-0.000107
45.709	0.02378	0.02419	0.02033	0.03912	0.01878	0.01787	-0.00111	-0.000864	-0.00182	6.91e-05	-0.00199	-0.00081
46.21	0.02361	0.02437	0.01962	0.03871	0.01941	0.01803	-0.00112	-0.000622	-0.00161	-0.000569	-0.00228	-0.00135
46.713	0.024	0.02418	0.02011	0.03807	0.0182	0.01875	-0.000978	-0.000699	-0.0017	-0.000854	-0.00186	-0.000746
47.211	0.02321	0.0236	0.01995	0.03927	0.01831	0.01832	-0.00128	-0.000545	-0.00219	-0.000718	-0.00238	-0.000214
47.709	0.0237	0.02448	0.02027	0.03884	0.01864	0.01822	-0.00157	-0.00139	-0.00269	-0.00126	-0.0011	-0.000763
48.21	0.02366	0.02348	0.02054	0.03931	0.01849	0.01816	-0.00161	-0.00147	-0.00188	-0.000643	-0.00125	8.89e-05
48.714	0.0235	0.02449	0.02055	0.03874	0.0192	0.01878	-0.00147	-0.00124	-0.00186	-0.00088	-0.00192	-0.000636
49.212	0.02311	0.02358	0.01978	0.03906	0.01821	0.01864	-0.000594	-0.00147	-0.00202	-0.000827	-0.00199	-0.00138
49.709	0.02396	0.02316	0.02031	0.03894	0.01826	0.01952	-0.00158	-0.000982	-0.00173	-8.31e-05	-0.00241	-0.000181
50.21	0.02243	0.02441	0.01936	0.03947	0.01838	0.01842	-0.00154	-0.00131	-0.00233	-1.64e-05	-0.00179	-0.000624
50.709	0.02408	0.02472	0.01995	0.03933	0.01863	0.01893	-0.00191	-0.000548	-0.00165	-0.000452	-0.0017	-0.00231
51.21	0.02334	0.02442	0.0209	0.0386	0.01793	0.01915	-0.00113	-0.000607	-0.00215	-0.000632	-0.00236	0.000448
51.715	0.02361	0.0238	0.0192	0.03951	0.01838	0.01864	-0.00136	-0.000983	-0.00196	-0.000418	-0.00252	-0.000638
52.21	0.02447	0.02412	0.02005	0.03936	0.01809	0.01816	-0.00102	-0.0011	-0.00202	-0.000312	-0.00261	0.000271
52.709	0.02448	0.02353	0.01989	0.03876	0.01781	0.01882	-0.0012	-0.000825	-0.00227	-0.000618	-0.00217	-0.000803
53.215	0.02328	0.02385	0.01943	0.03847	0.01763	0.01902	-0.000782	-0.00114	-0.00239	-0.000597	-0.00227	-0.000402
53.714	0.0231	0.02329	0.01943	0.03841	0.01736	0.01841	-0.00132	-0.000783	-0.00236	-0.000817	-0.00207	-0.000152
54.21	0.02425	0.02362	0.01868	0.03808	0.0177	0.01857	-0.00147	-0.000622	-0.0011	-0.000776	-0.00182	-0.00087
54.711	0.02375	0.02265	0.01933	0.03771	0.01684	0.0182	-0.000726	-0.000866	-0.00182	-0.000283	-0.00177	0.000477
55.211	0.02255	0.02163	0.01923	0.03651	0.0165	0.01799	-0.000424	0.000335	-0.00181	-0.000585	-0.0015	-0.000652
55.712	0.02318	0.022	0.01866	0.03647	0.0157	0.01815	-0.000872	-0.00027	-0.00163	-0.000311	-0.00136	-4.72e-05
56.211	0.02242	0.02081	0.01797	0.03555	0.01576	0.01773	-0.00138	0.00016	-0.00139	-0.000991	-0.00242	0.000295
56.71	0.02139	0.02086	0.01838	0.03549	0.0144	0.01748	-0.000712	-0.000325	-0.00167	-0.000482	-0.00124	6.14e-05
57.211	0.02274	0.01975	0.01783	0.03435	0.01345	0.01777	-0.000621	-0.000863	-0.00182	-0.000731	-0.00172	-1.83e-06
57.737	0.02256	0.01962	0.01751	0.03415	0.01363	0.01722	-0.000504	-0.000478	-0.0011	-0.000403	-0.00197	-0.000352
58.21	0.02229	0.01939	0.01653	0.03237	0.01308	0.01687	-0.000811	-0.000291	-0.00112	-0.00024	-0.00169	-0.000179
58.71	0.02165	0.01824	0.01685	0.03209	0.01173	0.01732	-0.000755	8.28e-05	-0.00129	-0.000275	-0.00161	0.000199
59.213	0.02106	0.01797	0.0163	0.03057	0.01091	0.01626	-0.00113	0.000222	-0.00172	-0.0005	-0.00167	0.000389
59.71	0.02112	0.01808	0.01565	0.03095	0.0099	0.01649	-0.000972	0.000109	-0.00139	-0.000247	-0.0017	0.000678
60.22	0.02139	0.01619	0.01588	0.03013	0.00958	0.01608	-0.000127	-0.000324	-0.0016	0.000236	-0.00163	0.00016
60.71	0.02064	0.01632	0.01513	0.02918	0.00847	0.01537	-0.000567	-0.00105	-0.00164	0.000304	-0.0016	0.000167
61.211	0.01968	0.01675	0.01507	0.02898	0.00819	0.01458	-0.000407	-7.42e-05	-0.000809	-0.000626	-0.00083	0.000225
61.709	0.0201	0.01528	0.01457	0.02734	0.00761	0.01503	-0.000975	-0.000201	-0.00104	-0.000385	-0.00124	-4.73e-06
62.21	0.01923	0.01449	0.01486	0.02679	0.00713	0.01455	-0.000923	-0.000505	-0.00155	-0.000714	-0.00123	0.00113
62.709	0.01966	0.01408	0.01421	0.02709	0.00586	0.01453	-0.00102	0.000145	-0.000892	1.25e-05	-0.00137	-0.00027
63.21	0.01932	0.01314	0.01321	0.02535	0.00589	0.01434	-0.000944	5.05e-05	-0.000214	-0.000562	-0.000444	0.000216
63.71	0.01839	0.01324	0.01356	0.02494	0.00509	0.01402	-0.00094	-0.000344	-0.000375	0.000218	-0.00105	0.000103
64.212	0.01845	0.01232	0.01325	0.02374	0.00434	0.01362	-0.00139	0.000261	-0.000642	-0.000506	-0.000826	0.00024
64.709	0.0174	0.01147	0.01277	0.02344	0.0035	0.01348	-0.000202	-0.00121	-0.00077	-4.71e-05	-0.000752	-0.000392
65.211	0.01788	0.01101	0.01245	0.0234	0.0031	0.01256	-0.0013	-0.0013	-0.00112	-0.000281	-9.6e-05	0.00107
65.709	0.01851	0.01012	0.01235	0.02212	0.00235	0.01307	-0.000954	-0.00097	-0.000295	3.09e-05	-0.00048	0.000599
66.21	0.01827	0.01025	0.01176	0.02199	0.00238	0.01313	-0.000739	-0.00044	-0.000893	8.29e-05	-0.0007	0.000898
66.708	0.01765	0.00923	0.01099	0.02171	0.00151	0.01239	-0.000302	0.000237	-0.0008	0.00024	-0.000119	0.00118
67.21	0.01671	0.00858	0.00977	0.02061	0.00135	0.01214	-0.000777	0.000697	-0.000258	-3.63e-05	-0.000561	0.000118
67.709	0.01608	0.00885	0.01025	0.0197	0.00108	0.01126	-0.00076	8.34e-05	-0.000595	0.000257	-0.00054	0.00073
68.21	0.0172	0.00899	0.01024	0.01931	0.00187	0.01112	-0.000312	-5.32e-05	-0.000369	-0.000134	-0.00021	-0.000162
68.718	0.01573	0.00815	0.00976	0.01915	0.00096	0.01088	-0.000841	0.000533	-0.000312	-0.000131	-0.000406	0.000772
69.21	0.01607	0.00723	0.01022	0.01794	0.00101	0.01114	-0.000994	0.000526	-4.27e-05	-3.15e-05	-0.000764	0.00099
69.71	0.01505	0.00579	0.00942	0.01775	0.000312	0.01028	-0.000705	0.000382	-1.6e-05	-6.53e-05	-0.000445	-0.000396
70.21	0.01528	0.00562	0.00893	0.01733	0.000518	0.00922	-0.000636	-7.87e-05	-0.000609	-0.000285	-0.000775	0.00107
70.708	0.01578	0.00603	0.00864	0.01638	0.000946	0.00936	-0.000765	-4.39e-05	7.67e-05	-0.000416	-0.000119	-0.000769
71.209	0.01461	0.00457	0.00801	0.01599	0.00031	0.00933	-0.0001	-0.000313	-0.000142	0.000405	5.03e-05	0.000217
71.708	0.01491	0.00463	0.00808	0.01533	0.000283	0.00847	-0.000558	-0.000398	-0.000964	-0.000507	3.82e-05	0.000747
72.212	0.01478	0.00466	0.00801	0.01471	2.05e-05	0.0086	-0.000113	-0.000283	-0.000605	0.000484	0.000114	0.000254
72.708	0.01381	0.0041	0.00834	0.01459	0.000148	0.00794	-0.000813	0.000454	-0.000153	0.000474	4.61e-05	6.64e-05
73.214	0.01382	0.00341	0.00766	0.01429	-0.00036	0.00777	-0.000725	-0.000123	0.000187	-0.000277	0.000578	-3.66e-05
73.708	0.01361	0.00381	0.00735	0.01445	-0.000329	0.00741	-0.000289	0.000328	0.000539	0.000791	0.000531	-0.000752
74.209	0.01367	0.00378	0.00611	0.0139	-0.000256	0.00732	-0.000426	-0.000544	0.000364	-1.98e-05	0.000214	-7.74e-05
74.708	0.01359	0.00285	0.00605	0.01321	4.14e-05	0.00709	-0.000926	5.44e-05	-0.000315	0.000325	-0.000321	-0.00053
75.209	0.0133	0.0029	0.0059	0.01284	0.000125	0.00648	0.000324	-0.000117	0.000144	0.00035	-8.83e-05	-0.000696
75.709	0.01273	0.0026	0.00642	0.01203	0.000151	0.00601	-5.54e-05	-0.000313	1.29e-05	0.000426	-0.000287	-0.000766
76.209	0.01349	0.00257	0.00521	0.01139	-0.00036	0.00582	-0.000409	-0.000341	-0.000684	0.000418	0.000186	0.000171
76.724	0.01344	0.00224	0.00527	0.01063	-0.000608	0.00561	-8.06e-05	-0.000228	-0.000556	0.000533	0.000782	0.000476
77.209	0.01104	0.00141	0.00452	0.01086	8.01e-05	0.00549	-0.000569	-0.000134	0.000177	0.000373	0.000731	-0.000763
77.708	0.01293	0.00181	0.00474	0.01012	-0.000662	0.00463	-0.000112	0.000355	0.000136	0.000446	-9.81e-05	-0.00142
78.209	0.01267	0.00111	0.00471	0.01017	-0.000637	0.00495	-0.000387	0.000793	0.000454	0.000319	-3.2e-06	-0.000682
78.708	0.01145	0.00139	0.00378	0.01012	0.000335	0.00446	-0.000789	-0.000904	0.000332	0.000171	2.9e-05	-0.000343
79.209	0.01182	0.00113	0.00394	0.01023	-0.000648	0.00371	-8.28e-05	0.000176	-0.000203	0.000523	0.00049	0.000751
79.71	0.01096	0.000621	0.00389	0.00877	-0.000131	0.00407	-0.000469	-0.000305	0.00039	-0.000358	0.000875	0.000164
80.209	0.01116	0.0011	0.00383	0.00869	-0.000492	0.00346	5.16e-05	-0.000278	0.000531	0.000156	0.000499	-0.000874
80.708	0.01045	0.00115	0.00422	0.0083	-0.000119	0.00358	-0.000506	7.31e-05	-0.000235	0.000224	0.000664	0.000231
81.21	0.01013	-0.000415	0.00348	0.008	0.000874	0.00266	-0.000648	-0.000522	0.000475	0.000667	0.000417	0.000233
81.708	0.01073	0.000147	0.00366	0.00705	0.00012	0.00296	-0.000705	-0.00119	0.000153	0.000572	0.000412	-0.000457
Figure 2 - Figure supplement 1E
Time	PTX + FR900359									w/o PTX + FR900359
0.705	3.46e-05	0.000233	-0.000258	-0.000276	-0.00018	0.00113	0.000107	0.000544	0.000135	-0.000644	-0.000231	-0.000245	0.000257	0.00224	0.000159	0.000549	0.000586
1.173	0.000661	0.000566	-0.000719	-0.000299	-0.000322	0.00125	9.23e-06	-0.000587	0.000761	0.00085	0.000666	-6.41e-05	0.00101	0.000127	0.000532	0.000666	-0.000407
1.618	-9.28e-06	-0.000112	0.000244	0.000935	-0.000644	-0.0011	0.000761	0.000343	0.000379	-3.68e-05	-0.00152	-0.000376	0.000191	0.000618	-0.000293	0.000854	-6.73e-05
2.119	-0.000857	8.63e-05	0.000128	-0.000393	-0.000234	0.00122	0.000997	0.000316	0.000939	-3.12e-05	0.000971	-0.000645	0.000724	0.000914	-0.000313	0.000699	0.000337
2.619	-0.000489	0.000183	-0.000364	0.000153	-0.000426	-3.45e-08	0.000678	0.000483	0.00122	0.000909	0.000601	-0.0002	0.000251	0.00127	-0.000119	-0.000262	-0.000595
3.119	-0.000667	0.000544	-0.000919	0.000289	-0.00029	-0.000244	0.000269	0.000121	0.000229	0.000887	-0.000779	-0.000599	0.000123	0.000245	-0.000358	-0.000371	0.000131
3.618	-0.000279	-2.94e-05	-0.000377	1.35e-05	-0.000593	0.000184	0.00117	0.000524	0.00025	-0.000143	-2.91e-05	-0.000215	0.000761	-0.000773	1.49e-05	4.87e-05	0.000277
4.119	-5.6e-05	-0.000131	-0.000137	0.000114	-0.000743	0.000915	0.000757	0.000579	0.000935	0.00119	-0.000172	0.000511	3.9e-05	-0.000354	0.000135	0.000462	0.00031
4.619	-0.00085	0.000556	-0.00042	0.00019	-9.47e-05	-0.000113	0.000788	0.000204	0.000949	0.000516	0.000132	0.000211	0.00132	-1.62e-05	0.000103	5.2e-05	0.000183
5.119	0.000232	-0.000576	-4.38e-05	9.22e-05	-0.000146	0.00106	0.000859	-0.000306	0.000953	0.000906	0.000143	-0.000426	-0.000136	-0.000264	-0.000261	6.83e-05	5.9e-05
5.619	0.000116	-0.000401	0.000149	0.000158	-0.000128	0.000934	0.000455	-0.000608	0.00113	0.000366	0.000525	5.79e-05	-0.000711	0.00142	0.000466	-0.000189	-0.000358
6.143	0.000126	0.000376	-0.000402	0.000244	-0.000293	0.000436	0.000367	-0.000491	0.000406	0.000241	0.00109	0.000118	-0.000382	-0.00217	0.000604	9.67e-05	0.000501
6.619	9.52e-05	0.000181	0.000567	3.18e-05	-0.000526	-0.000272	0.00017	5.45e-05	0.000617	0.00071	9.3e-05	-0.000241	0.000296	-0.000715	0.00033	0.000537	0.000112
7.121	-7.25e-05	-0.000205	-0.000844	-0.00131	-0.000252	0.00114	0.001	0.000688	0.00101	0.00051	0.000793	-0.00038	0.000247	-0.000559	0.000408	0.000105	-2.03e-05
7.619	0.000177	-0.000581	0.000408	0.000536	-0.000213	0.000419	-0.000437	-0.000335	0.000753	0.00161	-0.000855	0.000408	0.000769	-0.00113	-4.65e-05	0.000305	-0.000448
8.119	-1.73e-05	-0.000155	-0.000555	0.000553	-0.000837	-0.00104	0.00106	0.000587	0.000926	0.000591	0.000382	-0.000308	-1.81e-05	0.000663	0.000287	0.000641	0.00121
8.619	0.000482	-0.000558	-0.000497	-0.000305	-0.000474	-0.000295	0.000632	-0.000241	0.000399	0.000171	0.000731	-4.13e-05	0.0005	-0.00101	-0.000185	-9.79e-05	0.000508
9.12	-0.000201	-0.000613	-0.000188	-0.000191	-0.000251	0.0011	0.00137	-0.000337	0.00102	0.00145	-0.000187	-3.5e-05	0.000997	0.000514	-0.000682	0.000322	0.000132
9.618	-0.000343	-0.000258	-0.00104	-6.12e-05	-0.000377	0.000549	0.000474	-5.75e-05	0.000766	0.00055	0.000238	-0.000344	-1.22e-05	-0.000298	-0.000235	-0.000134	0.000599
10.118	-0.00017	-0.00076	-0.000506	-0.00059	-0.000761	0.000157	0.00115	-5.19e-05	0.00134	0.000993	0.000185	-0.000166	-0.000285	-0.000255	-3.46e-06	0.000505	0.000939
10.618	-9.82e-05	3.67e-05	0.000229	0.000276	-0.000328	-8.07e-05	0.000249	0.00023	0.00105	0.000934	-6.11e-05	-0.000216	-4.9e-05	0.000194	0.000263	0.000123	0.000572
11.119	-0.000447	-0.000487	-0.000167	0.000333	-0.000344	0.000126	0.000233	0.000485	0.000669	-0.000981	-0.000923	-9.5e-05	0.00034	0.000793	0.00034	-0.000173	-0.000577
11.618	-0.000389	-0.000245	-0.000262	2.81e-05	-7.3e-05	0.00065	0.00143	-0.000254	0.000863	0.000293	-0.00044	-0.000198	0.000273	-0.000621	-0.000257	-0.00049	0.000505
12.119	-9.71e-06	-0.0011	-0.000561	0.000604	-0.000292	0.000531	0.00109	-0.000281	0.000391	-0.000162	-0.000401	-0.000663	-0.000599	-0.0018	-0.0003	2.33e-05	-0.000576
12.618	0.000489	-0.000629	-0.000493	-2.8e-05	-0.000198	0.00145	0.00122	0.000582	0.000175	0.000277	-0.000113	-0.000246	-4.94e-06	0.000201	0.000445	0.000208	0.000594
13.119	-0.000915	-0.000502	-0.000725	0.00033	-0.000666	0.000385	0.00093	0.000782	0.000619	0.000358	0.00157	-0.00053	-0.00081	-0.000609	0.00017	5.88e-05	0.000392
13.619	1.54e-05	-0.000532	0.000121	8.67e-05	-0.000152	-0.000458	0.00161	0.000397	0.00117	-8.34e-05	0.000219	-0.000343	-0.000152	0.000894	-6.28e-05	0.000279	0.000905
14.119	-0.000278	-0.000735	-0.000262	-0.000447	2.54e-05	-0.000689	0.00185	0.000645	0.000602	-9.13e-05	-0.000809	-0.00074	-0.00038	-0.000586	-0.000411	-0.000492	0.000303
14.619	-0.00011	-0.000249	-0.000724	0.000229	-0.000229	0.000243	0.00101	-0.000169	0.000792	-0.000228	-0.00075	-0.00114	-0.000689	-0.000219	0.00017	-2.55e-05	0.000412
15.119	-0.000334	-0.000549	-0.000462	0.000424	-0.000553	-0.000522	0.000398	-0.000156	0.00134	0.00015	-0.000139	-0.000311	0.000587	8.02e-05	0.000229	-0.000378	0.000206
15.62	-0.000588	-0.000635	-0.000699	-9.12e-05	0.000665	0.000346	0.000926	-0.000839	0.000635	0.000298	-0.000387	-4.04e-05	-3.57e-05	0.000445	0.000412	-0.000451	2.82e-05
16.119	0.000471	-0.00032	4.88e-05	0.000623	-0.000971	0.00143	0.000738	0.000194	0.00112	0.000122	0.000899	-0.000623	-0.000646	-0.000101	-0.000147	-0.000306	-0.000511
16.618	0.000294	0.000141	-0.000464	2.22e-05	1.03e-05	0.000925	-1.54e-05	0.000163	0.00109	-0.00107	-0.00129	-0.000307	-3.39e-05	-0.00138	8.09e-06	-0.000401	-0.000536
17.12	-0.000296	-0.000594	-0.000159	3.34e-05	-0.000425	-0.000401	-0.00031	0.000412	0.00101	-0.000622	0.000599	-0.000499	0.000503	0.00173	-0.000703	-0.000714	0.000584
17.621	-0.000222	-0.00177	-0.00113	-0.000322	-0.000162	-0.000251	0.00101	-3.64e-05	0.000637	-0.000556	-0.000539	0.000502	0.000761	0.000226	-0.000129	0.000161	7.59e-05
18.119	-5.75e-05	-0.000807	-0.000542	0.000193	-0.000708	0.000375	-0.000456	0.000186	0.00137	-0.000284	0.000705	-0.000397	-0.000978	-0.000182	-0.000351	0.0004	-0.000163
18.618	5.86e-05	-0.000943	1.85e-05	-0.000136	-0.00118	0.000133	0.000858	-0.000928	0.000744	0.000894	-0.000145	-1.43e-05	0.000241	3.57e-05	-0.000377	0.000153	0.000242
19.119	-0.000283	-0.0004	-0.00106	0.00104	-5.37e-05	0.000545	0.000954	0.000145	0.00095	0.000917	-0.000641	-0.000462	-0.000404	0.000429	-1.8e-05	-0.000322	0.000492
19.62	-0.000788	0.000141	-0.000384	-0.000612	-0.00036	0.000151	0.00155	-0.000507	0.000579	0.000701	0.00121	0.000401	-0.000458	0.00035	-0.000313	0.000576	0.000636
20.119	-0.000421	-0.00031	-0.000516	-0.000365	-0.000651	1.07e-05	0.00164	-0.000242	0.000845	-0.000187	0.00105	0.000568	-0.000515	0.000324	0.000162	-7e-05	0.000662
20.619	-0.000362	-0.000866	-0.000267	0.000473	-0.000472	-0.000156	0.000818	-0.000545	0.00107	0.00356	-0.000542	-0.000659	0.00178	0.000148	0.000841	-0.000111	0.000469
21.119	0.000102	0.00378	0.0044	0.00182	0.00388	0.0034	0.00192	0.00255	0.00784	0.01392	0.00393	0.00797	0.00913	0.01022	0.00536	0.00718	0.01019
21.619	0.00224	0.0047	0.00675	0.00445	0.00542	0.006	0.0047	0.00436	0.00988	0.01871	0.00738	0.01018	0.01324	0.01709	0.00817	0.00916	0.01341
22.12	0.00342	0.0064	0.00683	0.00557	0.00588	0.00956	0.00598	0.00473	0.01037	0.02337	0.00889	0.01138	0.01561	0.02048	0.00968	0.01028	0.01423
22.619	0.00436	0.0051	0.00682	0.00546	0.00563	0.00905	0.00657	0.00567	0.0101	0.02312	0.01002	0.0115	0.01586	0.02207	0.01176	0.01079	0.0156
23.119	0.00501	0.00573	0.00673	0.00475	0.00588	0.01121	0.0065	0.00625	0.01032	0.02408	0.00993	0.01136	0.01652	0.02155	0.01174	0.01178	0.01732
23.619	0.0048	0.00603	0.00715	0.0059	0.0063	0.01029	0.00713	0.00536	0.01059	0.02546	0.01056	0.01232	0.01783	0.02359	0.01224	0.01165	0.01706
24.12	0.00543	0.00585	0.0064	0.00519	0.0055	0.01145	0.00683	0.00537	0.01122	0.02629	0.01136	0.01234	0.01909	0.02477	0.01282	0.01168	0.01698
24.619	0.00608	0.0056	0.00704	0.00523	0.00681	0.01094	0.0075	0.00629	0.01114	0.02668	0.0109	0.01257	0.01786	0.02222	0.01385	0.01185	0.0167
25.12	0.00599	0.00557	0.0073	0.00582	0.00592	0.0118	0.00781	0.0062	0.01155	0.02745	0.01056	0.01197	0.01835	0.02389	0.01454	0.01275	0.01782
25.62	0.00629	0.00564	0.00765	0.00506	0.00621	0.01152	0.00731	0.00551	0.01059	0.02722	0.01038	0.01337	0.01767	0.02326	0.0146	0.01179	0.01791
26.119	0.00566	0.00691	0.00706	0.00536	0.00572	0.00942	0.00663	0.00648	0.01209	0.02866	0.01052	0.01223	0.018	0.0244	0.01521	0.01186	0.0187
26.62	0.00659	0.00644	0.0079	0.00536	0.006	0.01154	0.00678	0.0062	0.01108	0.02751	0.01111	0.01308	0.01893	0.02256	0.01579	0.01192	0.01859
27.12	0.00613	0.00664	0.00725	0.00468	0.00587	0.01171	0.00781	0.00597	0.01114	0.02906	0.01065	0.01316	0.01923	0.02285	0.01629	0.0116	0.0188
27.619	0.00605	0.00648	0.00736	0.00606	0.00592	0.01032	0.00858	0.0056	0.01151	0.02963	0.01197	0.01384	0.01941	0.02328	0.01635	0.01154	0.01964
28.119	0.00645	0.00706	0.00697	0.00559	0.00603	0.01062	0.00853	0.00606	0.01105	0.02894	0.01164	0.01306	0.0191	0.02406	0.01581	0.01165	0.01957
28.619	0.0059	0.00654	0.00821	0.00645	0.00616	0.01131	0.00699	0.00568	0.01093	0.02951	0.01088	0.01334	0.019	0.02385	0.01709	0.01186	0.01925
29.12	0.00708	0.00653	0.00799	0.00486	0.00577	0.0106	0.00793	0.00666	0.01129	0.02908	0.01057	0.01328	0.02009	0.02494	0.0179	0.01213	0.01892
29.619	0.0065	0.00682	0.00793	0.0063	0.00633	0.01191	0.00698	0.00592	0.01069	0.03074	0.01171	0.01418	0.01911	0.02374	0.0174	0.01233	0.01817
30.121	0.00684	0.00656	0.00751	0.00596	0.00596	0.01259	0.0072	0.00606	0.01061	0.03061	0.01185	0.01422	0.01973	0.02598	0.01792	0.01177	0.01873
30.619	0.00678	0.00591	0.00807	0.00658	0.00674	0.01141	0.007	0.00596	0.01105	0.03062	0.01205	0.01389	0.0198	0.02455	0.01842	0.01282	0.01833
31.12	0.00644	0.00635	0.00818	0.00589	0.00563	0.01063	0.00719	0.00651	0.01034	0.03082	0.01123	0.01319	0.0197	0.02338	0.01798	0.0125	0.01948
31.62	0.00668	0.00657	0.00734	0.00664	0.00541	0.01132	0.00794	0.00628	0.01028	0.03108	0.01257	0.01398	0.02031	0.0256	0.01881	0.01186	0.01939
32.122	0.00675	0.00597	0.00733	0.0059	0.00607	0.01139	0.00718	0.00627	0.0101	0.03083	0.01066	0.01404	0.02097	0.02439	0.0192	0.01198	0.01854
32.619	0.00738	0.00592	0.00748	0.00581	0.00663	0.0105	0.00747	0.00578	0.00976	0.03238	0.01154	0.01401	0.01962	0.02742	0.01913	0.01243	0.01899
33.12	0.00673	0.00547	0.00755	0.00689	0.00607	0.01064	0.00721	0.00622	0.01036	0.03214	0.01234	0.01283	0.02055	0.02678	0.01892	0.01198	0.01876
33.625	0.00661	0.00639	0.00826	0.00656	0.00545	0.01147	0.0072	0.00536	0.00996	0.03088	0.01113	0.01338	0.02193	0.02582	0.01981	0.01244	0.01857
34.121	0.00634	0.00591	0.00766	0.00676	0.00597	0.01139	0.00704	0.00552	0.01085	0.03145	0.01262	0.0143	0.02087	0.02607	0.01943	0.01206	0.0191
34.62	0.00705	0.00706	0.00839	0.00641	0.00582	0.01121	0.00663	0.00691	0.01054	0.03294	0.01166	0.01315	0.02146	0.02672	0.01949	0.01229	0.01884
35.121	0.007	0.00635	0.00733	0.00656	0.00675	0.01082	0.00709	0.00575	0.0098	0.03266	0.01201	0.01343	0.021	0.02631	0.01956	0.01155	0.01928
35.621	0.0076	0.00665	0.00813	0.00605	0.00667	0.01153	0.00687	0.00608	0.0106	0.03186	0.01177	0.01336	0.02179	0.02705	0.02049	0.0118	0.01878
36.144	0.00728	0.00675	0.0075	0.00626	0.00615	0.00985	0.00636	0.00646	0.01003	0.03352	0.01382	0.01319	0.02121	0.028	0.02136	0.01189	0.01873
36.62	0.00745	0.00689	0.00855	0.00677	0.00611	0.01127	0.00622	0.00604	0.00986	0.03327	0.01397	0.01291	0.02141	0.02487	0.02105	0.01239	0.01913
37.122	0.00709	0.00619	0.00832	0.00564	0.006	0.01113	0.00728	0.00593	0.01093	0.0327	0.01308	0.01355	0.0223	0.02514	0.02061	0.0118	0.01947
37.62	0.00731	0.00693	0.00908	0.00717	0.00629	0.01145	0.0065	0.00661	0.00982	0.03267	0.0132	0.01391	0.02146	0.02594	0.02018	0.01253	0.0198
38.121	0.00735	0.00597	0.00861	0.00615	0.00652	0.01111	0.00593	0.00599	0.01008	0.03283	0.0128	0.01348	0.02171	0.027	0.02071	0.01242	0.01902
38.62	0.00794	0.00702	0.00872	0.00611	0.00647	0.0095	0.00597	0.00637	0.00911	0.03329	0.01447	0.01424	0.02155	0.02613	0.02038	0.01237	0.02002
39.12	0.00799	0.00595	0.00859	0.00639	0.00612	0.01097	0.00684	0.00646	0.00973	0.03342	0.01286	0.01386	0.02188	0.02697	0.02081	0.01198	0.01937
39.621	0.00732	0.00729	0.00878	0.00727	0.00549	0.01106	0.00623	0.00644	0.00991	0.0335	0.01379	0.01431	0.02187	0.02773	0.02137	0.0124	0.01933
40.121	0.00704	0.00712	0.00839	0.00591	0.00597	0.01143	0.00568	0.00683	0.01057	0.03478	0.01231	0.01404	0.02194	0.02686	0.0214	0.01208	0.01932
40.621	0.0073	0.00626	0.00782	0.006	0.00563	0.01102	0.00743	0.00661	0.00945	0.03345	0.01319	0.01409	0.02116	0.02785	0.02085	0.01229	0.01909
41.12	0.0073	0.00741	0.00822	0.00662	0.0057	0.01076	0.00663	0.00615	0.00934	0.033	0.0125	0.01381	0.02182	0.02561	0.02057	0.01216	0.01901
41.62	0.00755	0.00714	0.00786	0.00619	0.0058	0.01051	0.00629	0.00625	0.00987	0.03378	0.01234	0.01384	0.02095	0.02676	0.02127	0.01298	0.01946
42.12	0.00825	0.00678	0.00851	0.00616	0.00564	0.01233	0.00575	0.00558	0.0094	0.03365	0.01424	0.01339	0.02223	0.02683	0.02101	0.01223	0.01927
42.62	0.00759	0.00653	0.00821	0.00572	0.00612	0.01093	0.00628	0.00563	0.00991	0.03427	0.01217	0.01345	0.02194	0.02613	0.02058	0.01257	0.01895
43.12	0.00755	0.0069	0.00829	0.00625	0.00557	0.00965	0.00637	0.00613	0.01045	0.03375	0.01233	0.01347	0.02132	0.02734	0.02108	0.01199	0.02006
43.62	0.00755	0.00685	0.00855	0.0063	0.00567	0.0109	0.00548	0.0054	0.00965	0.03442	0.01269	0.0133	0.02179	0.02753	0.02136	0.01225	0.01892
44.119	0.00734	0.00665	0.008	0.00642	0.00579	0.0112	0.00659	0.00633	0.00936	0.03335	0.01276	0.01308	0.02131	0.02739	0.02113	0.01201	0.01919
44.619	0.00782	0.00695	0.00922	0.00715	0.00587	0.01006	0.00643	0.00581	0.0094	0.03397	0.0119	0.01371	0.02176	0.02884	0.02089	0.01186	0.01854
45.12	0.00776	0.00669	0.00859	0.00745	0.00546	0.01076	0.00607	0.00579	0.00962	0.03354	0.01401	0.01399	0.02173	0.0272	0.0208	0.01215	0.01964
45.619	0.00715	0.00712	0.00804	0.00636	0.00575	0.01062	0.00622	0.00633	0.00881	0.03477	0.01356	0.01352	0.02224	0.0266	0.02123	0.01208	0.0197
46.119	0.00859	0.00723	0.00869	0.00732	0.00581	0.01078	0.00634	0.00607	0.00946	0.03457	0.01192	0.01325	0.02205	0.02602	0.02064	0.01216	0.01894
46.619	0.00724	0.00717	0.00871	0.00656	0.00484	0.01165	0.00564	0.00599	0.00992	0.03555	0.01243	0.01289	0.02138	0.02756	0.02037	0.01179	0.01936
47.119	0.00737	0.00681	0.00933	0.00633	0.00563	0.01158	0.00627	0.00567	0.00904	0.03416	0.01319	0.01385	0.02078	0.02533	0.02062	0.01219	0.01826
47.62	0.00791	0.00715	0.00841	0.00674	0.00627	0.01171	0.00536	0.00644	0.00936	0.03529	0.0146	0.01405	0.02185	0.02801	0.02007	0.01169	0.01954
48.12	0.00732	0.00661	0.00848	0.00594	0.00609	0.01021	0.0062	0.00588	0.0096	0.03404	0.01311	0.01398	0.02124	0.02722	0.02007	0.0114	0.01924
48.62	0.0087	0.0064	0.00865	0.00791	0.00636	0.01065	0.0054	0.006	0.00944	0.03568	0.01237	0.01373	0.02155	0.02738	0.02043	0.01229	0.01899
49.12	0.00706	0.00642	0.00827	0.00717	0.00608	0.01085	0.00517	0.00687	0.0093	0.03466	0.01369	0.01423	0.02171	0.02705	0.02083	0.01159	0.01883
49.619	0.00811	0.00729	0.0088	0.00713	0.00583	0.01096	0.00556	0.00663	0.00877	0.03519	0.01217	0.01346	0.02174	0.02828	0.02053	0.01194	0.01873
50.12	0.0075	0.00631	0.00885	0.00571	0.00605	0.00985	0.00636	0.00675	0.00852	0.03405	0.01462	0.0142	0.0211	0.02852	0.02066	0.01096	0.01894
50.619	0.00723	0.00759	0.00898	0.00756	0.00549	0.00966	0.00568	0.00664	0.00878	0.03445	0.01301	0.01359	0.02205	0.02732	0.02031	0.0123	0.01923
51.12	0.00762	0.00411	0.00712	0.00593	0.00638	0.00802	0.00403	0.00659	0.00669	0.03501	0.0101	0.01326	0.02199	0.02755	0.01975	0.01003	0.01858
51.622	0.00747	0.00281	0.00598	0.00365	0.00486	0.00617	0.00219	0.00564	0.00425	0.02883	0.00902	0.00902	0.01746	0.02309	0.01717	0.00694	0.0148
52.121	0.00768	0.00151	0.00491	0.00361	0.00398	0.00543	0.00208	0.00603	0.0024	0.02418	0.00735	0.00744	0.015	0.01859	0.016	0.00622	0.01275
52.619	0.00521	0.00157	0.00431	0.00219	0.00185	0.00213	0.000935	0.00526	0.000907	0.02157	0.00717	0.00519	0.01274	0.01447	0.01546	0.00521	0.01154
53.12	0.00346	0.00149	0.00301	0.00229	0.00269	0.00172	4.87e-05	0.00379	0.000888	0.0184	0.00662	0.00462	0.01096	0.01338	0.0131	0.00473	0.00983
53.621	0.00273	0.00166	0.00342	0.00176	0.00171	0.000805	0.000573	0.0027	0.000578	0.01916	0.00565	0.00475	0.00908	0.0102	0.01359	0.00451	0.00902
54.12	0.00189	0.00123	0.00248	0.00263	0.000959	-0.000276	-0.000691	0.00243	-0.000613	0.01663	0.00596	0.00394	0.00919	0.0116	0.01237	0.00394	0.00872
54.62	0.00093	0.000669	0.0027	0.00156	0.00158	-0.000299	-0.00169	0.00175	-0.000784	0.01604	0.00668	0.0038	0.00882	0.00964	0.01161	0.00385	0.0085
55.121	0.00147	0.000283	0.00217	0.00191	0.00139	0.00139	-0.00108	0.00128	-0.000668	0.01609	0.00487	0.00283	0.00788	0.01215	0.01098	0.00337	0.00799
55.621	0.000721	0.00115	0.00242	0.000932	0.000835	-1.66e-05	0.000519	0.000962	-0.000534	0.01574	0.00471	0.00291	0.00823	0.00906	0.01055	0.00419	0.00782
56.12	0.00103	0.00112	0.00235	0.00191	0.000347	-0.000652	0.000695	0.000824	-0.00111	0.01475	0.00327	0.0026	0.00726	0.01113	0.00982	0.00416	0.00803
56.623	0.00109	0.000697	0.00148	0.00151	0.000607	-0.00038	-0.000183	0.000367	-0.000839	0.01382	0.00434	0.00245	0.00723	0.01012	0.01025	0.00328	0.00702
57.12	0.000562	9.49e-05	0.00172	0.000552	0.000243	-0.00054	-0.000711	0.000885	-0.0014	0.01344	0.00461	0.00246	0.00594	0.00903	0.00941	0.00365	0.0069
57.62	0.000599	0.00054	0.00216	0.00173	9.18e-05	-0.00166	-0.000252	0.000468	-0.000523	0.01293	0.00447	0.00263	0.00548	0.00802	0.00944	0.00303	0.00628
58.12	0.000224	0.000735	0.00176	0.00146	0.000634	-0.000782	-0.00123	-0.000129	-0.00184	0.0144	0.00523	0.00279	0.00523	0.00871	0.00888	0.00293	0.00612
58.62	0.00055	0.000114	0.00195	0.000525	0.000229	-0.000171	-0.000566	0.000557	-0.00119	0.01313	0.0055	0.0024	0.00671	0.00747	0.00876	0.00271	0.00573
59.12	-0.000168	0.000922	0.0015	0.000865	0.000828	-0.000758	-0.0003	0.000231	-0.00111	0.01364	0.00365	0.00207	0.00517	0.00514	0.00801	0.00323	0.00548
59.62	3.63e-05	0.00052	0.00124	0.00126	0.000111	-0.000716	-0.000859	0.000283	-0.00106	0.01262	0.004	0.00185	0.00474	0.00717	0.00871	0.0024	0.00578
60.123	0.000274	0.000457	0.00133	0.00045	9.6e-05	-0.000387	-0.000253	0.000168	-0.00131	0.01161	0.00218	0.00251	0.00521	0.00779	0.00721	0.00265	0.00579
60.62	0.000553	0.000388	0.00189	0.000237	0.000747	0.000765	-0.000606	0.000367	-0.00107	0.01196	0.00372	0.00165	0.00483	0.00524	0.00784	0.00257	0.00512
61.12	0.000268	-7.24e-06	0.00155	0.000406	-5.74e-05	-0.00116	-0.000694	-0.000527	-0.000394	0.01158	0.00472	0.00188	0.00463	0.00482	0.00784	0.00216	0.00542
61.619	8.74e-05	0.000433	0.00209	0.000152	0.000173	3.57e-05	-0.000802	-0.000504	-0.000517	0.01153	0.00439	0.00141	0.00362	0.00481	0.0072	0.00297	0.0049
62.119	0.000139	0.00049	0.000738	0.0013	8.32e-05	0.000316	-0.000515	0.000496	-0.000913	0.01256	0.00473	0.00184	0.00487	0.00575	0.00711	0.00217	0.00438
62.619	0.000279	0.000594	0.0015	0.000674	-0.000135	-0.00055	-0.0013	0.000262	-0.000992	0.01234	0.00295	0.00117	0.00428	0.00581	0.00682	0.00159	0.00447
63.119	4.16e-05	-0.000226	0.00105	-0.000106	0.000127	-0.000208	-0.000624	0.000448	-0.00114	0.01135	0.00427	0.0022	0.00283	0.0048	0.00669	0.00109	0.00409
63.618	-0.000359	0.000988	0.000719	0.000107	-0.000359	0.000547	0.00035	-0.000303	-0.00097	0.01087	0.00368	0.00161	0.00359	0.00495	0.00631	0.00153	0.00446
64.121	-3.59e-05	0.00102	0.00138	0.000649	-0.000139	0.000522	-0.000519	0.00072	-0.000965	0.01154	0.00388	0.0019	0.00248	0.00402	0.00626	0.00146	0.00465
64.619	5.51e-05	0.000312	0.002	0.000646	-0.000208	-0.000624	-0.000794	4.54e-05	-0.0017	0.01055	0.00334	0.00114	0.0036	0.00405	0.00566	0.00222	0.00454
65.119	-0.000593	0.00113	0.000508	0.000698	-0.000417	0.000729	0.000597	0.000356	-0.000627	0.01085	0.002	0.000989	0.00351	0.00539	0.00595	0.00209	0.00388
65.619	-0.000331	0.000602	0.000305	0.000892	-0.000345	0.000139	-0.000384	-5.38e-05	-0.0011	0.0106	0.0021	0.0011	0.00317	0.00522	0.00591	0.00179	0.00358
66.146	0.00075	0.000293	0.00152	0.00102	-7.78e-05	-0.00116	-0.000616	0.000351	-0.000282	0.00998	0.00323	0.00196	0.00298	0.00246	0.00495	0.00123	0.00321
66.625	-4.66e-05	0.000406	0.000568	0.00125	-0.000974	-0.000236	-0.00121	8.66e-05	-0.000792	0.00801	0.00169	0.000983	0.00301	0.00345	0.00487	0.0019	0.00467
67.119	0.000322	9.98e-05	0.00141	6.76e-05	-0.00025	0.000339	-0.000745	0.000469	-0.00118	0.0095	0.00209	0.00115	0.00324	0.00237	0.00496	0.00206	0.00437
67.619	0.000202	0.00129	0.00078	0.000133	-0.000323	-0.000708	-0.000431	0.000247	-0.00106	0.00854	0.00269	0.00131	0.0023	0.00283	0.00497	0.0022	0.00445
68.119	-1.29e-05	0.000393	0.00109	0.000237	-0.000525	-0.000835	-0.000216	-0.000227	-0.000824	0.008	0.00229	0.000765	0.0021	0.00218	0.00461	0.0015	0.00305
68.619	0.000204	0.000373	0.00132	0.000941	-0.000649	4.72e-07	-0.000819	-0.000118	-0.000763	0.00842	0.00213	0.000799	0.00271	0.00618	0.00404	0.00158	0.00371
69.119	-0.000675	9.28e-05	0.00104	0.000836	-8.92e-05	-0.000164	-0.00126	9.22e-05	-0.000235	0.00914	0.00242	0.00153	0.00283	0.00278	0.00493	0.00183	0.00347
69.619	0.000327	0.00043	0.000924	0.00126	-0.000352	0.00039	-0.000786	0.000435	-0.000508	0.00851	0.00162	0.0013	0.00265	0.00287	0.00412	0.00143	0.00334
70.12	0.000191	0.000174	0.00032	0.000984	-0.000324	-0.00101	-0.000914	0.000455	2.39e-05	0.00832	0.00251	0.000971	0.00328	0.00351	0.00431	0.0015	0.0035
70.619	-1.24e-05	0.000801	0.000667	0.000176	-0.00033	-0.000609	-0.0017	0.000393	-0.001	0.00805	0.00167	0.000505	0.00349	0.00298	0.00375	0.00128	0.00297
71.118	-0.000417	-0.000466	0.000794	0.000346	-0.000176	-0.000762	-0.000104	0.000782	-0.001	0.00827	0.00106	0.00152	0.00256	0.00374	0.00353	0.00161	0.00406
71.618	0.000111	0.000904	0.000876	0.000883	-0.000279	2.4e-06	-0.000665	0.000256	-0.00145	0.00869	0.000958	0.000922	0.00206	0.00247	0.00435	0.00147	0.0034
72.119	0.000616	0.0012	0.000357	-0.000198	-6.86e-05	-0.000294	-0.000279	0.000553	2.36e-05	0.00737	0.000521	0.000826	0.00262	0.00358	0.00375	0.00148	0.0037
72.626	-5.82e-05	0.000677	0.000884	1.03e-05	-0.000469	-0.00015	-0.000693	0.000544	-0.000635	0.00832	0.00304	0.00119	0.00185	0.00416	0.00375	0.00127	0.00282
73.118	5.2e-05	4.16e-05	0.000752	0.0011	0.000246	0.000365	-0.0013	-5.02e-05	-0.000914	0.0073	0.00302	0.00115	0.00211	0.00323	0.00401	0.0013	0.00278
73.618	-0.000339	0.000497	0.000182	4.69e-05	0.00102	0.00153	0.000195	0.000105	-0.000158	0.00817	0.00194	0.000979	0.0025	0.00305	0.00384	0.00133	0.0024
74.119	-0.000381	0.000429	0.000972	0.000209	0.000823	-0.000855	-0.000652	-0.000558	-0.00015	0.00671	0.00177	0.000584	0.0023	0.00328	0.00251	0.00156	0.00311
74.618	0.00038	0.00109	0.00131	0.000605		-0.000699	0.000298	0.00076	-0.000698	0.00802	0.00205	0.000882	0.0021	0.00535	0.00355	0.00148	0.00271
75.118	0.000176	0.00119	0.000579	0.000887		0.000204	-0.000298	0.000204	0.000101	0.00638	0.0015	0.00103	0.000295	0.00203	0.00345	0.00147	0.00313
75.619	-0.000163	0.000854	0.000637	-8.03e-05		0.000487	0.000419	-6e-05	-0.000557	0.00699	0.00238	0.000708	0.0012	0.00304	0.00366	0.00114	0.00317
76.118	0.000415	8.65e-05	0.000653	-2.81e-05		-0.000967	-0.000121	-0.000172	-0.000194	0.00626	0.00201	0.000909	0.00302	0.00272	0.00343	0.000681	0.00339
76.618	0.000314	0.000689	0.000144	3.14e-05		0.000783	-0.000722	0.000344	-0.000274	0.00628	0.00195	0.000658	0.00162	0.00407	0.00341	0.000688	0.00321
77.119	-0.000395	0.000599	-8.37e-05	0.00036		0.000991	0.000167	-0.000215	-0.000155	0.00643	0.000819	0.000598	0.00153	0.00488	0.00252	0.00101	0.00287
77.618	-0.000686	0.0009	0.000726	-0.000661		0.000698	-0.000871	0.000355	0.00018	0.00637	-9.13e-05	0.00184	0.00242	0.00398	0.00284	0.000705	0.00275
78.118	-0.000325	0.000544	0.000663	-0.000895		-0.00017	-0.000312	-0.000167	0.000381	0.00719	0.00215	0.000959	0.00136	0.00333	0.00273	0.00189	0.00272
78.619	-0.000112	0.000685	0.000714	0.000609		-0.000649	-0.000651	0.000279	-0.000593	0.00606	0.0012	0.000922	0.00191	0.000912	0.00288	0.000963	0.00188
79.119	0.000514	0.000475	0.000704	0.000424		0.00194	-0.00141	0.001	0.000733	0.00564	-0.000111	0.000948	0.00263	0.00291	0.00245	0.00121	0.0018
79.618	3.03e-05	0.000926	0.00027	-0.000273		0.000205	-0.000577	0.000578	-0.000144	0.00755	0.00124	0.000929	0.000722	0.000874	0.00245	0.00147	0.00322
80.119	-0.000398	-5.47e-05	0.000162	0.00084		0.00132	0.000425	-0.000355	-0.000222	0.00607	0.001	0.000961	0.00136	0.00152	0.00248	0.000102	0.00293
80.619	-4.22e-05	0.000101	0.000323	-9.23e-05		0.000827	-0.00061	-0.000163	0.00033	0.00556	0.00112	0.000138	0.00179	0.00214	0.00241	0.000971	0.00248
81.119	0.000338	0.00062	0.000575	6.93e-05		-0.00022	-0.00132	0.000749	-0.0004	0.00531	0.000114	0.00125	0.0013	0.00309	0.00245	-6.01e-05	0.00215
81.619	-0.000162	0.00041	0.000239	0.000184		0.000504	-0.000644	-7.17e-05	0.000526	0.00574	0.000375	0.000765	0.00141	0.00305	0.00158	0.00026	0.00286
82.119	7.76e-06	0.000363	0.00116	-0.000144		0.000623	-0.00165	6.97e-05	4.03e-05	0.00579	0.00123	0.0011	0.00201	0.00174	0.00154	0.0012	0.00143
82.618	0.000635	0.00032	0.000298	-0.000112		0.000826	-0.000435	-0.000653	4.88e-05	0.00574	0.000293	0.000565	0.00168	0.00193	0.00241	0.00112	0.0025
83.128	0.000176	0.000103	0.000414	-0.000499		-0.000921	-0.00109	-0.00025	7.4e-05	0.00417	0.00044	0.000843	0.00179	0.0036	0.00122	0.00122	0.00244
83.62	0.000467	6.65e-05	0.00088	-0.000393		-0.000856	-0.00132	0.0009	0.000141	0.0057	0.00234	4.71e-05	0.00184	0.00132	0.00189	0.000259	0.00189
84.119	0.000156	-0.00038	0.000346	-0.000488		-0.000312	0.000264	3.46e-05	0.000748	0.00462	0.00146	0.00143	0.000956	0.00154	0.0019	0.000132	0.0023
84.619	6.14e-05	0.000557	0.00024	-0.000154		-0.000205	0.00026	-0.000127	-0.00104	0.00446	-0.000589	0.000682	0.000767	0.00306	0.00209	0.000584	0.00244
85.12	0.000179	-0.000476	0.000285	-0.000367		0.00225	0.000406	-0.000138	0.000121	0.00489	0.00134	0.00104	0.000602	0.00392	0.00181	0.000891	0.00195
85.622	0.000648	0.000323	0.000619	-0.000465		0.0004	-0.000299	-8.82e-05	-0.000856	0.00455	0.00107	0.000812	0.00169	0.00172	0.00192	0.000465	0.00211
86.119	-0.000673	-7.9e-05	0.000141	0.000926		5.78e-05	-0.000196	-0.00021	0.000426	0.00401	0.00132	0.000413	0.000917	0.00354	0.00138	0.000735	0.00213
86.619	0.000109	0.000196	0.000379	-0.000346		0.00149	-0.000894	0.000803	-0.000174	0.00509	2.69e-05	0.00109	0.00174	0.00293	0.00234	0.00071	0.00219
87.119	0.000487	-5.93e-05	0.000352	0.00033		0.000518	-0.000813	1.22e-05	0.00048	0.0046	0.00179	0.000449	0.000447	0.00326	0.0021	0.000379	0.00202
87.618	-3.78e-06	0.000208	0.000133	-4.24e-05		0.000445	-7.07e-05	0.000699	-0.000135	0.00481	-0.000279	0.0013	0.000407	0.00205	0.00153	0.000201	0.00181
88.12	5.66e-05	1.25e-05	3.76e-05	-0.00077		0.000199	-0.000737	-0.000463	-9.67e-06	0.00407	-0.000294	0.000294	-1.22e-06	0.00221	0.00136	0.00019	0.00157
88.619	0.000392	0.000222	0.000527	-0.000683		0.00118	-0.000957	0.000254	-0.000501	0.00434	-6.06e-05	0.000956	0.000743	-0.000662	0.00116	0.000148	0.00177
89.12	0.000168	0.000211	0.000433	-0.000241		0.00174	-0.000872	-0.000584	0.000148	0.00364	0.000577	0.000758	0.000463	0.0015	0.00158	0.000651	0.0021
89.619	-0.000557	3.24e-05	0.00065	-0.000574		0.00096	-0.00163	8e-05	0.000467	0.00472	0.000674	0.000872	-0.000304	0.00231	0.00179	0.000511	0.00195
90.12	-0.000191	6.71e-05	1.81e-05	-8e-05		4.93e-05	-0.0012	0.000284	0.000159	0.00388	0.000961	-0.000123	0.000848	0.00248	0.000958	-0.000168	0.0022
90.619	-0.000342	0.000108	0.000152	-0.000835		0.000577	-0.00027	-0.000403	0.000189	0.0044	-0.000329	0.000175	-2.72e-06	0.000933	0.000958	-0.000952	0.00225
91.12	0.000725	0.000226	0.000562	4.95e-05		0.000971	-0.000988	0.000352	0.000276	0.00496	0.000923	0.000695	7.26e-05	0.0037	0.00153	-0.000588	0.00134
91.619	0.000375	0.000473	-0.000362	-0.000814		-0.000709	-0.000938	-0.000333	0.000949	0.00352	-0.000206	0.000611	-0.000219	0.00389	0.000596	-0.000131	0.00205
92.119	0.000428	-0.000207	6.96e-05	0.000333		0.000204	-3.85e-05	-0.000313	0.000388	0.00331	-2.56e-06	0.00103	0.000407	0.00147	0.0012	6.7e-05	0.00165
92.62	6.22e-05	0.000214	-0.000204	0.000209		0.00108	-0.00103	-0.000116	-0.000277	0.00395	0.000987	-0.000153	0.00042	0.000619	0.00145	2.55e-05	0.00143
93.119	0.000724	0.000538	-0.000189	-9.77e-05		0.000927	-0.00166	-0.000218	0.000154	0.00374	0.000326	0.00017	0.000444	0.000276	0.00102	1.57e-05	0.00201
93.619	0.00123	0.000705	0.000592	-0.000842		-0.000472	-0.000353	0.000287	0.00038	0.004	0.000597	0.000386	0.000343	0.00065	0.00146	-0.000191	0.000871
94.12	0.000669	-0.000261	-0.000275	-0.000616		0.000143	-0.000699	-0.000593	0.000737	0.00256	-3.73e-05	0.000128	1.11e-05	0.00155	0.000163	0.000413	0.002
94.619	0.00104	0.000526	-1.29e-05	-0.000139		0.00142	-0.000501	4.42e-05	0.000641	0.00343	-0.000682	0.000742	0.000433	0.0015	0.000878	0.000711	0.000869
95.12	0.000807	0.000619	-0.000247	0.000309		0.000552	0.00042	0.000277	-0.000617	0.00411	0.000926	0.000797	0.000716	0.00124	0.000968	-0.000236	0.00217
95.619	0.000233	0.00029	0.000231	-5.99e-05		0.000627	2.75e-05	-6.35e-05	-0.000463	0.00354	-7.75e-05	0.000342	0.000544	0.00152	0.00137	0.000486	0.000758
96.123	0.00078	0.00047	-0.000697	2.86e-05		0.000804	0.000249	-0.000199	0.000162	0.00275	0.00107	0.000746	-2.85e-05	0.00114	0.00117	-4.78e-05	0.00178
96.619	0.0003	6.12e-05	-0.000498	-0.000667		0.000928	-0.00116	-0.000123	-0.000549	0.00434	-6e-05	0.000164	-0.000301	-0.000105	0.000817	-2.4e-05	0.000902
97.121	6.21e-05	-0.000184	0.000709	-0.000456		0.000797	-0.000524	-0.000193	0.000345	0.00288	-0.000471	4.11e-05	0.000374	-0.00019	0.000832	-0.000129	0.00132
97.62	0.000351	-0.000331	-6.89e-05	-0.000862		0.000403	-0.000213	0.000601	0.000238	0.00213	0.000353	-0.000234	0.000393	0.00179	0.000744	-6.72e-05	0.00186
98.12	-2.26e-05	0.000499	-0.000176	-0.000131		-0.000125	0.000561	-0.000149	-0.000269	0.00325	-0.000384	0.000298	-0.000363	0.00151	0.00111	0.000235	0.00147
98.62	-0.000558	6.42e-05	0.00021	5.96e-05		0.00128	-0.000436	0.000159	-0.000314	0.00318	-0.000732	0.000173	0.000857	-0.000368	0.000945	-0.000215	0.00163
99.119	-0.000731	0.000604	-0.000428	-0.000493		0.000488	-0.000227	-0.000382	5.56e-05	0.00288	0.00177	-0.000104	0.00077	0.001	0.000603	0.00046	0.00104
99.619	-0.000605	-6.45e-06	-6.19e-05	0.000116		5.36e-06	-0.000676	-0.000272	-8.93e-05	0.00297	-0.000616	0.00034	-0.000205	0.000738	0.000864	-0.000127	0.00174
100.121	-0.000627	-0.000328	-0.000432	-0.000177		0.00156	-0.000359	1.29e-05	-0.00075	0.00245	-1.46e-06	-0.00013	0.000573	0.00259	0.000622	4.33e-05	0.00103
100.62	-0.000227	0.00021	-0.000481	-0.000496		-0.00123	-0.000715	-0.000166	0.000692	0.00179	-0.000248	-0.000308	0.000684	0.0012	0.000533	-0.000494	0.00118
101.121	-0.000652	0.000322	-5.13e-05	-0.000538		0.00173	-0.000328	0.000153	0.000702	0.00274	-0.000234	8.8e-05	0.000514	-0.00157	0.000746	0.000532	0.00109
101.619	-0.000764	-0.000129	0.000438	-0.000564		0.00012	-0.000664	2.58e-05	0.000379	0.00284	0.000895	-0.000216	0.000164	-0.00104	0.001	7.49e-05	0.000619
102.119	-9.49e-06	-0.000389	-0.00019	0.000131		0.0017	-0.000244	0.000164	0.000135	0.00236	0.000183	-0.000718	0.0012	0.000828	0.00103	0.00042	0.00116
102.626	-0.000753	0.000429	-0.00013	0.000717		0.000454	5.93e-05	-0.000533	0.000279	0.00203	0.000158	5.93e-05	0.000891	5.08e-05	0.000465	0.000178	0.00149
103.12	-0.000534	0.000333	-0.000301	-0.000119		0.000235	0.000422	0.000298	0.000181	0.00243	0.000314	-0.000131	0.00116	-0.000305	0.000116	-0.000156	0.000983
103.618	-0.000944	0.000105	-0.000676	-0.00168		0.000633	-0.00086	-0.000894	0.000667	0.00258	0.00133	-0.000616	0.00119	-0.000478	0.00131	0.000171	0.000907
104.119	-0.000455	-0.000285	-4.74e-06	0.000273		0.00171	-0.00022	-0.00012	0.000371	0.00191	-0.000134	-0.000595	0.000984	-4.88e-05	-1.88e-05	-0.000219	0.00122
104.618	-0.00103	0.00013	0.000167	-0.000478		-0.000257	0.000237	-0.000642	0.00038	0.00191	9.73e-05	-0.00079	0.0014	-0.00169	0.000337	-0.000346	-5.54e-05
105.123	-0.00151	-0.000396	-0.000199	-0.000241		-0.000331	-0.000849	0.000373	0.000609	0.0014	-0.000529	-0.000194	0.00143	0.000329	0.000673	0.000668	0.000514
105.619	-0.000858	-0.000469	-0.000571	0.00017		0.00224	3.98e-05	0.00016	0.000336	0.00195	0.001	0.00016	0.00103	8.16e-05	0.00014	-0.000546	0.00096
106.119	-0.000775	-0.000642	-0.000318	-0.000317		0.000411	0.000487	0.000767	-0.000308	0.00107	-0.000806	-0.00136	0.00147	-3.63e-05	0.000781	-5.07e-05	0.000531
106.618	-0.0007	0.000124	0.000216	3.52e-05		0.000206	-0.000219	0.000242	-0.000384	0.00247	-0.000219	-0.00023	0.00114	0.000222	0.000202	-6.99e-05	0.00184
107.12	-0.000816	-0.000315	-0.000468	7.96e-06		-3.75e-05	0.000807	-0.000448	-7.17e-05	0.00194	0.000431	-0.000727	0.000882	-0.000215	0.000297	-0.000488	0.00118
107.618	-0.000601	0.000168	0.000475	-0.000222		8.54e-05	0.00028	0.00057	0.00106	0.00184	3.03e-07	-0.000856	0.000414	0.000282	0.000437	-0.000268	0.00104
Figure 2 - Figure supplement 1F
time	w/o PTX + FR900359								PTX + FR900359
0.598	0.985	0.999	1.02	1.03	0.982	1.01	1.02	0.991	1.03	1.1	1.05	1.04	0.918	0.915	0.878	1.13	0.986
1.1	0.961	0.776	0.983	0.842	0.955	1.02	1.01	1.01	0.555	0.781	0.804	1.03	0.967	0.759	1.02	0.888	0.781
1.598	0.653	0.693	0.783	0.583	0.83	0.855	0.804	0.829	0.38	0.424	0.511	0.88	0.948	0.584	0.777	0.547	0.656
2.098	0.539	0.565	0.675	0.522	0.773	0.688	0.691	0.695	0.204	0.403	0.288	0.941	0.975	0.514	0.636	0.541	0.539
2.598	0.376	0.551	0.611	0.438	0.747	0.536	0.587	0.62	0.212	0.181	0.109	0.821	0.661	0.202	0.296	0.328	0.473
3.098	0.335	0.508	0.52	0.397	0.633	0.495	0.505	0.529	0.201	0.00943	0.107	0.591	0.439	0.163	0.43	0.343	0.33
3.682	0.344	0.434	0.477	0.379	0.657	0.378	0.418	0.551	0.224	0.111	0.0695	0.421	0.347	0.0762	0.273	0.264	0.375
4.196	0.285	0.458	0.461	0.331	0.598	0.429	0.423	0.478	0.166	-0.134	-0.0736	0.379	0.24	-0.0261	0.153	0.394	0.272
4.598	0.275	0.513	0.45	0.323	0.561	0.357	0.406	0.461	0.0904	-0.327	-0.0942	0.273	0.118	-0.0283	0.253	0.234	0.296
5.098	0.205	0.374	0.423	0.283	0.531	0.45	0.363	0.463	0.0383	-0.209	-0.0802	0.2	0.187	0.132	0.222	0.286	0.238
5.597	0.211	0.362	0.414	0.352	0.51	0.335	0.379	0.453	0.155	0.1	-0.0642	0.15	0.0915	-0.00158	0.134	0.14	0.266
6.098	0.188	0.251	0.425	0.349	0.475	0.412	0.334	0.424	0.151	0.135	-0.133	0.129	0.131	-0.0618	0.0555	0.286	0.258
6.597	0.177	0.333	0.371	0.275	0.495	0.375	0.333	0.397	0.0942	-0.0354	-0.101	0.0573	0.138	-0.036	0.0971	0.226	0.162
7.098	0.178	0.354	0.365	0.307	0.455	0.334	0.273	0.386	0.0128	-0.138	-0.168	0.138	0.0713	-0.0512	0.0388	0.0827	0.189
7.598	0.191	0.343	0.332	0.254	0.456	0.297	0.252	0.372	0.0729	-0.0488	-0.0629	0.0731	0.0761	-0.157	0.0147	0.259	0.237
8.098	0.202	0.402	0.324	0.246	0.429	0.322	0.241	0.414	0.0993	-0.238	-0.221	-0.0201	0.0284	-0.0741	0.101	0.219	0.193
8.598	0.174	0.422	0.303	0.228	0.423	0.277	0.309	0.378	0.0154	-0.11	-0.143	0.087	0.0698	-0.0162	0.0366	0.0786	0.214
9.098	0.15	0.28	0.29	0.271	0.387	0.19	0.238	0.392	0.125	-0.0581	-0.133	0.036	-0.0214	-0.0718	0.132	0.13	0.165
9.597	0.134	0.307	0.306	0.202	0.421	0.265	0.218	0.363	0.0702	-0.166	-0.127	0.0441	0.00461	-0.0678	0.0177	0.189	0.136
10.098	0.182	0.167	0.306	0.223	0.348	0.288	0.24	0.334	0.0617	-0.0491	-0.157	0.0263	0.0348	-0.0366	0.0153	0.0674	0.146
10.598	0.12	0.286	0.271	0.216	0.379	0.194	0.222	0.344	0.0525	-0.117	-0.129	0.0573	0.0702	0.0725	0.12	0.0354	0.207
11.098	0.136	0.363	0.287	0.181	0.379	0.178	0.213	0.333	-0.000978	-0.134	-0.0473	-0.0822	0.034	-0.11	-0.00918	0.0608	0.17
11.598	0.102	0.337	0.259	0.249	0.348	0.178	0.167	0.332	0.0585	-0.155	-0.0621	-0.0787	0.0111	0.00338	0.0276	0.0228	0.229
12.099	0.133	0.363	0.232	0.182	0.344	0.213	0.224	0.361	0.0662	-0.0997	-0.11	0.0774	0.0176	0.0299	0.0133	0.195	0.081
12.598	0.0848	0.227	0.236	0.134	0.33	0.215	0.197	0.355	0.0803	-0.252	-0.119	0.0409	0.0354	-0.0521	-0.0216	0.101	0.165
13.098	0.159	0.328	0.216	0.0915	0.323	0.178	0.13	0.326	-0.0305	-0.121	-0.137	0.0699	0.00528	-0.0197	0.0204	-0.0159	0.115
13.598	0.117	0.283	0.236	0.129	0.305	0.183	0.165	0.313	0.133	0.0678	-0.117	-0.0473	-0.0455	0.0518	-0.0574	0.0161	0.0789
14.099	0.138	0.298	0.246	0.123	0.303	0.149	0.114	0.332	0.138	-0.101	-0.116	0.112	-0.00455	0.0494	-0.0223	0.0972	0.151
14.598	0.0826	0.257	0.24	0.186	0.274	0.15	0.166	0.303	0.0422	-0.154	-0.204	0.00708	0.00699	-0.0591	-0.0332	0.0967	0.219
15.098	0.0717	0.154	0.205	0.176	0.288	0.2	0.162	0.312	0.153	0.116	-0.0754	0.0556	-0.0753	0.069	-0.0667	0.105	0.0557
15.598	0.0797	0.161	0.189	0.15	0.286	0.193	0.146	0.305	0.0813	-0.0744	-0.132	-0.0084	-0.0421	0.0132	-0.0552	0.134	0.0335
16.098	0.142	0.248	0.17	0.103	0.239	0.0911	0.137	0.287	0.0396	-0.119	-0.0339	0.0547	0.0952	-0.11	-0.0124	0.153	0.167
16.598	0.0712	0.13	0.247	0.16	0.235	0.128	0.139	0.23	0.0549	-0.234	-0.0952	0.0135	-0.00591	-0.0224	-0.156	0.187	0.0623
17.098	0.0833	0.161	0.231	0.173	0.24	0.0877	0.149	0.273	0.0135	-0.144	-0.142	0.0732	0.0409	0.0321	-0.0399	0.0101	0.155
17.598	0.0949	0.207	0.235	0.185	0.24	0.105	0.106	0.246	0.174	-0.0835	-0.127	0.0385	0.0256	-0.067	-0.0517	0.0199	0.0856
18.104	0.0554	0.176	0.161	0.126	0.223	0.0807	0.0967	0.23	0.0531	-0.0419	-0.099	-0.0354	-0.00164	-0.0791	-0.0839	0.0354	0.12
18.598	0.0579	0.164	0.196	0.133	0.195	0.229	0.125	0.242	0.0505	-0.159	-0.0916	-0.0184	0.0259	4.47e-05	-0.104	0.141	0.145
19.099	0.111	0.186	0.184	0.154	0.238	0.103	0.13	0.263	0.0125	-0.244	-0.0283	0.0144	-0.0857	-0.0156	-0.0143	0.125	0.114
19.598	0.0942	0.124	0.177	0.12	0.199	0.106	0.122	0.245	0.0581	-0.152	-0.061	0.0679	0.0415	0.0369	-0.0562	0.189	0.101
20.099	0.0704	0.193	0.185	0.126	0.208	0.13	0.151	0.239	0.0234	-0.177	0.00287	0.0709	0.0243	-0.0956	-0.0517	0.147	0.0351
20.598	0.0366	0.128	0.157	0.108	0.181	0.11	0.161	0.231	0.108	-0.329	-0.12	0.0613	-0.00157	-0.0576	-0.0527	0.0263	0.0732
21.098	0.11	0.0814	0.215	0.135	0.171	0.138	0.118	0.238	-0.063	-0.0201	-0.12	0.122	-0.0529	-0.0722	-0.0281	0.0519	0.0871
21.598	0.0668	0.0736	0.18	0.123	0.21	0.0915	0.0948	0.25	0.122	-0.129	-0.174	0.0399	0.0141	0.000227	-0.0447	0.132	0.0962
22.098	0.0598	0.04	0.196	0.124	0.181	0.133	0.121	0.212	0.162	-0.0541	0.00284	0.0863	0.0782	-0.0279	-0.011	-0.0296	0.0392
22.598	0.0862	0.233	0.149	0.107	0.181	0.154	0.0852	0.239	0.0915	-0.134	-0.0763	0.0848	-0.00738	-0.0142		0.00154	0.097
23.098	0.0833	0.232	0.147	0.109	0.194	0.12	0.0971	0.21	0.00563	-0.252	-0.11	-0.00783	0.0066	0.0345		0.165	0.0825
23.598	0.0709	0.149	0.127	0.112	0.186	0.113	0.115	0.235	0.0672	0.0377	-0.019	0.0164	-0.043	0.145		0.00702	0.02
24.099	0.0423	0.136	0.165	0.131	0.121	0.121	0.106	0.193	0.0579	-0.126	-0.0181	-0.087	-0.0484	-0.081		0.0313	0.107
24.599	0.0639	0.157	0.143	0.124	0.172	0.198	0.0967	0.231	0.147	0.0578	-0.0839	0.119	0.0482	-0.0662		0.0906	0.144
25.1	0.0746	0.115	0.166	0.123	0.167	0.0752	0.0136	0.183	0.161	-0.0577	0.0121	0.0319	0.0223	0.0193		0.133	0.0636
25.598	0.0513	0.183	0.168	0.0957	0.177	0.113	0.0552	0.201	0.115	0.0811	-0.067	-0.00936	-0.0207	0.0461		-0.012	0.0699
26.099	0.0658	0.154	0.179	0.0572	0.166	0.101	0.139	0.18	0.0117	-0.0234	-0.0233	-0.0269	0.0526	-0.0916		-0.00421	0.0716
26.599	0.0476	0.15	0.17	0.0578	0.165	0.151	0.0746	0.181	0.0931	-0.14	-0.0329	0.0537	0.0398	0.0741		0.0047	0.0158
27.099	0.0433	0.0629	0.152	0.0848	0.122	0.181	0.0704	0.185	0.0809	0.0324	-0.0186	-0.0336	-0.0501	0.0938		0.0539	-0.00918
27.599	0.133	-0.00701	0.145	0.0592	0.137	0.147	0.111	0.183	0.122	-0.169	0.0217	0.0554	-0.0871	0.0661		-0.099	0.0796
28.099	0.0694	0.165	0.144	0.159	0.132	0.123	0.0626	0.207	0.0735	-0.0605	0.0457	-0.0261	-0.0412	-0.0161		-0.134	0.0728
28.599	0.0668	0.0922	0.0995	0.0808	0.139	0.0338	0.0879	0.174	0.0926	-0.126	-0.0713	0.0435	-0.0142	-0.0615		0.0912	0.0784
29.098	0.0687	-0.00853	0.0952	0.102	0.118	0.108	0.121	0.162	0.0642	-0.273	0.088	0.156	0.0653	0.184		0.0635	0.0772
29.597	0.0673	0.0952	0.17	0.123	0.118	0.0323	0.0332	0.217	0.125	-0.112	-0.0173	0.0902	0.00385	0.0194		-0.0409	0.0296
30.098	0.0696	0.0768	0.155	0.00854	0.12	0.0563	0.0626	0.175	-0.00739	0.0823	-0.0267	-0.0555	-0.0505	0.125		0.126	0.0178
30.598	0.01	0.086	0.131	0.0816	0.116	0.0792	0.0824	0.16	0.0136	-0.118	0.0396	-0.0254	-0.00535	0.0783		-0.0138	0.0354
31.099	0.0906	0.00878	0.114	-0.00505	0.118	0.114	0.0599	0.153	0.0838	-0.256	-0.0481	0.117	0.0428	-0.0208		0.0104	0.0631
31.598	0.0554	0.0288	0.151	0.0218	0.0764	0.113	0.0649	0.165	0.0554	-0.125	0.0632	-0.0112	-0.0205	0.0478		0.0275	0.0262
32.099	0.0797	0.0945	0.0757	0.101	0.0744	0.0644	0.0925	0.167	0.049	-0.32	0.00485	0.0109	0.000985	0.059		-0.0216	0.127
32.598	0.0409	0.0225	0.132	0.0941	0.116	0.0715	0.0773	0.165	0.0433	-0.0842	0.00586	-0.102	0.0806	0.0782		-0.0167	0.0328
33.098	0.0611	0.0338	0.129	0.102	0.059	0.133	0.0824	0.12	0.0139	-0.211	0.00889	-0.0391	0.0224	-0.0872		-0.0748	0.0455
33.599	0.00341	0.18	0.1	0.0217	0.0913	0.0489	0.0847	0.164	0.00898	-0.256	0.017	0.14	0.0593	-0.081		-0.0588	0.0966
34.098	0.104	0.112	0.122	0.0111	0.0918	0.057	0.044	0.133	-0.0513	0.0512	0.0899	0.00539	0.0199	-0.0295		-0.073	0.0379
34.598	0.0494	-0.0452	0.129	0.049	0.101	0.113	0.0353	0.128	0.0752	0.0504	-0.125	-0.0199	0.00779	-0.0194		-0.023	0.0263
35.098	0.0753	0.103	0.103	0.0748	0.0875	0.145	0.0277	0.141	-0.0643	0.0786	0.0145	-0.0215	0.0227	0.213		-0.055	0.0313
35.598	0.0588	0.0822	0.112	0.039	0.0928	0.0637	0.0778	0.131	0.0437	-0.0579	-0.103	-0.0138	0.0823	0.0379		-0.0696	0.0679
36.098	0.0299	0.101	0.113	0.0617	0.0667	0.131	0.0422	0.115	-0.0107	-0.038	0.0512	-0.0327	-0.0855	0.00547		0.139	0.0154
36.598	0.079	0.00207	0.116	0.0596	0.113	0.108	0.0801	0.146	0.0265	-0.173	-0.0209	0.125	0.0139	0.141		-0.0518	0.0416
37.098	0.0325	0.137	0.107	0.0318	0.101	0.121	0.0206	0.132	-0.00802	-0.157	0.0577	0.0019	0.0618	0.0491		0.0495	0.0386
37.598	0.0942	-0.0214	0.0958	0.0169	0.0739	0.0759	0.0188	0.138	0.028	-0.0137	-0.0163	0.109	-0.00048	0.0422		-0.00635	0.0146
38.099	0.0213	-0.0226	0.0831	0.0159	0.0657	0.0818	-5.61e-05	0.117	0.00169	-0.143	-0.00116	-0.0722	0.00718	0.0188		-0.115	0.00413
38.598	0.0693	-0.00466	0.0936	0.0124	0.0561	-0.0245	0.0342	0.125	0.03	-0.185	-0.0602	0.0396	0.0498	0.112		-0.102	0.0579
39.099	0.0549	0.0443	0.111	0.0546	0.0764	0.0555	0.0213	0.105	0.0285	-0.169	0.0178	-0.0911	0.0213	0.165		-0.036	0.0476
39.598	0.0631	0.0518	0.103	0.0429	0.0865	0.0855	-0.014	0.136	0.00437	-0.316	0.0561	0.0125	-0.0708	0.0909		-0.0859	0.0714
40.098	-0.00891	0.0738	0.116	-0.0141	0.0463	0.0918	0.0391	0.112	0.00907	-0.232	0.0191	0.0444	-0.0242	0.00467		-0.012	0.00198
40.598	0.0127	-0.0253	0.119	-0.08	0.0463	0.0345	-0.000125	0.127	0.0146	-0.0523	0.0226	-0.0629	-0.0434	0.0546		-0.125	0.0167
41.099	0.0503	0.0709	0.0709	-0.0494	0.0739	0.137	0.00334	0.143	0.0305	-0.191	0.0331	0.0549	0.092	0.092		0.00742	0.0617
41.598	0.0443	-0.0158	0.108	-0.011	0.0288	0.144	-0.0101	0.101	0.064	-0.182	0.114	-0.0519	0.0476	-0.0671		-0.122	-0.0398
42.098	0.0746	-0.000196	0.0873	0.00563	0.058	0.0544	0.0187	0.0952	-0.028	-0.00746	0.0467	-0.0489	0.0543	0.0193		0.0499	0.00764
42.599	-0.0111	0.0758	0.0757	0.00214	0.0701	0.0229	0.0194	0.114	0.029	-0.2	-0.0332	-0.0181	0.0079	0.102		0.0312	-0.0224
43.099	0.0123	0.025	0.106	0.00132	0.0493	0.0102	0.0204	0.108	0.0728	-0.322	0.0185	-0.034	0.0919	0.0878		-0.0146	-0.0208
43.598	0.0279	0.0458	0.0461	-0.0161	0.0706	0.0241	0.0158	0.115	0.0952	-0.0683	0.0456	0.0448	0.156	-0.0447		-0.126	0.0649
44.1	0.00924	-0.00286	0.106	0.0347	0.00786	0.0574	0.00051	0.0736	-0.0353	-0.135	0.0885	-0.0926	0.0849	0.0135		-0.0923	-0.0302
44.599	0.0538	-0.0524	0.046	0.0597	0.0424	0.0555	0.0199	0.0986	0.0711	-0.0971	0.0771	0.0069	0.132	0.134		-0.0209	-0.00141
45.099	0.0578	0.0711	0.115	-0.0198	0.0468	0.0459	0.033	0.118	0.0836	0.0813	-0.0742	0.0432	0.102	0.0523		0.0463	-0.0271
45.599	0.0248	-0.00595	0.0401	0.0408	0.0662	0.0563	0.025	0.102	0.0392	0.00533	-0.0556	-0.00991	0.0296	0.0593		-0.00897	0.0253
46.099	0.0541	0.0822	0.0942	-0.00402	0.0565	0.0422	-0.00131	0.0791	0.0635	0.0483	0.0194	-0.031	0.0989	0.0761		0.00428	-0.0765
46.597	0.0119	-0.00461	0.0477	-0.00202	0.0395	-0.0039	-0.0138	0.125	0.00827	-0.225	-0.0659	-0.0192	0.0381	0.0879		-0.0999	-0.0546
47.106	0.00298	-0.0362	0.0698	-0.0109	0.0402	-0.00704	0.0172	0.0828	-0.0248	-0.101	0.0414	-0.0301	0.00788	0.0755		-0.0683	0.0778
47.598	-0.017	0.0271	0.0984	-0.00565	0.036	0.0663	0.0181	0.0613	-0.0447	-0.0412	0.0286	0.0938	0.0446	0.0382		-0.129	-0.00756
48.098	0.0216	-0.0295	0.0778	0.0197	0.0536	0.0559	-0.0167	0.0935	0.0674	0.109	-0.0323	-0.0233	-0.00287	-0.0118		-0.0196	-0.0193
48.599	0.0125	-0.0562	0.0862	-0.0181	0.0457	-0.0136	0.0394	0.0914	0.00868	-0.0845	-0.0377	0.0249	-0.0708	0.121		0.00893	0.023
49.099	-0.0075	0.136	0.055	0.0386	0.0292	0.037	0.0354	0.0828	0.0817	-0.0439	0.00668	-0.0597	-0.0928	0.0462		-0.0737	-0.047
49.599	0.0246	-0.0473	0.0921	-0.0106	0.0417	0.0273	-0.00942	0.0854	-0.000872	-0.131	-0.0107	-0.0425	-0.0767	0.000508		0.0174	-0.0068
50.122	-0.00944	-0.000112	0.0545	0.00363	0.0301	0.0959	0.0264	0.0705	-0.0443	-0.0696	-0.0901	0.00201	-0.0795	0.148		-0.0265	-0.0474
50.598	-0.0223	-0.0191	0.0624	-0.0415	0.0257	0.0444	0.0315	0.0515	0.0283	-0.139	0.0832	-0.0259	-0.0288	-0.116		-0.0743	-0.0528
51.099	0.00637	-0.018	0.0577	0.0447	0.0361	-0.0581	0.0237	0.0788	0.0434	-0.0636	0.0844	0.0239	-0.0827	0.164		-0.0806	-0.00563
51.599	-0.0156	0.0688	0.0328	0.00629	0.0483	-0.0385	0.00757	0.0817	-0.0174	-0.129	0.0455	0.00402	-0.097	0.0113		-0.0844	0.0481
52.099	-0.052	0.0141	0.0614	0.0353	0.0498	0.0306	0.0552	0.0679	-0.0525	-0.0474	0.0162	0.0256	-0.00121	0.161		0.0197	-0.0208
52.599	0.0043	0.0121	0.0788	0.0149	0.0225	0.00188	0.041	0.0584	0.0579	0.0115	0.0335	-0.0832	-0.0956	0.0429		0.107	-0.0143
53.099	-0.00948	0.0241	0.052	-0.0131	0.00559	-0.0113	0.0534	0.0699	0.045	0.0817	0.0218	0.0465	-0.0677	0.0223		-0.0178	-0.0331
53.599	-0.0447	0.102	0.048	0.0144	0.0633	-0.0177	0.0548	0.0742	0.0142	-0.167	0.0801	-0.139	-0.12	0.06		-0.252	-0.0742
54.099	-0.0431	-0.0103	0.0645	-0.0184	-0.00091	-0.00181	0.0453	0.0549	-0.0385	-0.0427	0.0445	-0.0188	-0.0577	0.162		0.0409	-0.00052
54.598	-0.0572	0.00747	-0.00293	-0.029	0.0163	-0.0626	0.0645	0.0549	0.0176	0.0459	0.0456	-0.1	-0.131	-0.0244		-0.0716	0.0184
55.099	-0.014	-0.0406	0.0272	0.0561	0.0325	0.0122	0.0658	0.0403	-0.0535	-0.164	0.0732	0.0582	-0.192	-0.0313		-0.036	-0.0219
55.599	0.0116	0.0768	0.0508	-0.0459	0.00677	0.00302	0.0474	0.0561	-0.0634	0.00772	0.0404	0.0249	-0.109	0.212		0.0255	-0.0627
56.1	-0.0985	-0.0619	0.0281	-0.00426	0.0377	-0.00135	0.0677	0.0308	-0.0867	0.0943	-0.037	0.12	-0.0983	0.039		-0.0475	-0.0349
56.6	-0.0167	-0.0168	0.0973	-0.00587	0.00974	0.00824	0.0525	0.071	0.0168	-0.0423	-0.0461	0.0378	-0.0888	0.0195		0.00526	0.0237
57.1	-0.0527	0.0331	0.0624	-0.041	0.0143	-0.00797	0.0406	0.0558	-0.0426	0.156	-0.00862	-0.07	-0.104	-0.00355		0.00119	-0.0514
57.601	-0.062	2.33e-05	0.055	-0.0225	0.0211	0.0104	0.0191	0.0529	0.0227	0.0542	0.127	0.089	-0.0763	0.00809		-0.0332	0.0521
Figure 2 - Figure supplement 1G
w/o PTX + FR900359:												Mean:	SD:
K(fast)		0.3907	0.2876	0.5053	0.2951	0.2805	0.2602	0.6052	0.3634			0.3735	0.115361
K(slow)		0.0502	0.03255	0.0622	0.05753	0.04314	0.04373	0.06467	0.03586			0.048735	0.0111736
Half Life (Fast)		1.774	2.41	1.372	2.349	2.471	2.664	1.145	1.908			2.01162	0.516782
Half Life (Slow)		13.81	21.3	11.14	12.05	16.07	15.85	10.72	19.33			15.0337	3.5992
Percent Fast		79.62	65.64	60.73	35.63	70.02	74.68	43.75	51.17			60.155	14.4435
PTX + FRFR900359:
K		0.5886	0.5894	0.2379	0.4979	0.3142	0.2538	0.2173	0.4795	0.2688		0.383044	0.145436
Half Life		1.178	1.176	2.914	1.392	2.206	2.731	3.19	1.446	2.578		2.09011	0.754287
Figure 2 - Figure supplement 1I
	M3R-YFP			M3R-mTurq
	ACh 30 µM	Are 50 µM	Pilo 50 µM	ACh 30 µM	Are 50 µM	Pilo 50 µM
	1	0.695525	0.442107	1	0.762	0.568
	1	0.772522	0.601489	1	0.67	0.462
	1	0.780968	0.47422	1	0.609	0.308
	1	0.793248	0.617224	1	0.747	0.468
	1	0.697161	0.374393	1	0.697	0.429
	1	0.67404	0.426654	1	0.745	0.509
Mean	1	0.735577	0.489348	1	0.705	0.457333
SD	0	0.0476412	0.0899385	0	0.0534135	0.0797447
Figure 2 - Figure supplement 1K
	ACh 30 µM	Are 50 µM	Pilo 50 µM
	1	0.273	-0.0284
	1	0.315	0.152
	1	0.326	0.108
	1	0.329	0.18
	1	0.253	0.079
	1	0.297	0.152
	1	0.284	0.118
	1	0.195	0.0364
	1	0.172	-0.0075
	1	0.265	0.0793
	1	0.236	0.111
	1	0.277	0.112
Mean	1	0.2685	0.0909833
SD	0	0.0468126	0.0608568
