# Supplementary material for: Disentangling bias between Gq, GRK2, and arrestin3 recruitment to the M3 muscarinic acetylcholine receptor
Source: eLife. 2021 Dec 1;10:e58442. doi: 10.7554/eLife.58442 (PMC8635974; doi:10.7554/eLife.58442)
Supplement: Figure 2—figure supplement 3—source data 1. [file elife-58442-fig2-figsupp3-data1.xlsx]

## Sheet: Tabelle1
Figure 2-Figure supplement 3
Pilocarpine 50µM a)			Pilocarpine 50µM b)			Methacholine 50µM a)			Methacholine 50µM b)			Mda 100µM a)			Mda 100µM b)			Guvacoline 50µM a)			Guvacoline 50µM b)			Furmethiodide 50µM a)			Furmethiodide 50µM b)			Arecoline 50µM a)			arecoline 50µM b)			ACh 30µM a)			ACh 30µM b)
Mean	SEM	N	Mean	SEM	N	Mean	SEM	N	Mean	SEM	N	Mean	SEM	N	Mean	SEM	N	Mean	SEM	N	Mean	SEM	N	Mean	SEM	N	Mean	SEM	N	Mean	SEM	N	Mean	SEM	N	Mean	SEM	N	Mean	SEM	N
0.529716	0.037111	8	0.498752	0.021784	5	0.880507	0.0211983	8	0.934673	0.0437545	6	0.198754	0.0271349	6	0.200096	0.0186113	7	0.479851	0.0466222	7	0.534501	0.0308499	9	0.807138	0.0480849	7	0.793166	0.0245575	6	0.384527	0.0383673	8	0.427098	0.0311881	6	1	0	8	1	0	5
	a) all agonists measured in one cell
	b) agonist measured directly after Ach
