# Supplementary material for: Disentangling bias between Gq, GRK2, and arrestin3 recruitment to the M3 muscarinic acetylcholine receptor
Source: eLife. 2021 Dec 1;10:e58442. doi: 10.7554/eLife.58442 (PMC8635974; doi:10.7554/eLife.58442)
Supplement: Figure 2—source data 1. [file elife-58442-fig2-data1.xlsx]

## Sheet: Tabelle1
Figure 2 B: M3R-(D110A)GRK2-CAAX
	ACh 30 µM	Are 50 µM	Guva 50 µM	Pilo 50 µM	Metha 50 µM	Fur 50 µM	Mda 100 µM
	1	0.236	0.262	0.03	0.746	0.602	0.146
	1	0.0152	0.0854	0.153	0.726	0.817	0.12
	1	0.308	0.377	0.0914	0.813	0.637	0.0819
	1	0.0876	0.328	0.00346	0.568	0.544	0.0512
	1	0.185	0.232	0.0459	0.681	0.528	0.0322
	1	-0.0368	0.254	0.174	0.552	0.402	-0.0152
	1	0.135	0.125	0.153	0.785	0.703	0.323
	1	0.244	0.135	0.0415	0.73	0.542	-0.0292
	1	0.119	0.14	0.0129	0.769	0.517	-0.0667
	1	0.129	0.283	0.0538	0.753	0.596	-0.172
	1	0.0782	0.161	0.096	0.421	0.438	-0.117
	1	0.118	0.194	0.0345	0.759	0.54	-0.101
Mean	1	0.13485	0.2147	0.0741217	0.691917	0.572167	0.0211
SD	0	0.0932881	0.0856023	0.0560713	0.112355	0.107009	0.130408
Figure 2 D:
Methacholine 50µM 1.stim			Methacholine 50µM 2.stim
Mean	SEM	N	Mean	SEM	N
0.784827	0.0465788	6	0.934673	0.0437545	6
Figure 2 F: M3R-arrestin3 recruitment
Pilocarpine 50µM all			Methacholine 50µM all			Mda 100µM all			Guvacoline 50µM all			Furmethiodide 50µM all			Arecoline 50µM all			ACh 30µM all
Mean	SEM	N	Mean	SEM	N	Mean	SEM	N	Mean	SEM	N	Mean	SEM	N	Mean	SEM	N	Mean	SEM	N
0.529716	0.037111	8	0.880507	0.0211983	8	0.198754	0.0271349	6	0.479851	0.0466222	7	0.807138	0.0480849	7	0.384527	0.0383673	8	1	0	8
