# Supplementary material for: Disentangling bias between Gq, GRK2, and arrestin3 recruitment to the M3 muscarinic acetylcholine receptor
Source: eLife. 2021 Dec 1;10:e58442. doi: 10.7554/eLife.58442 (PMC8635974; doi:10.7554/eLife.58442)
Supplement: Figure 3—figure supplement 1—source data 1. [file elife-58442-fig3-figsupp1-data1.xlsx]

## Sheet: Tabelle1
Figure 3 Figure supplement 1B: M3R-GRK2 recruitment
ACh 30µM			Furmethiodide 50µM			Furmethiodide 30µM			Mda 100µM			Mda 150 µM
Mean	SD	N	Mean	SD	N	Mean	SD	N	Mean	SD	N	Mean	SD	N
1	0	6	0.847629	0.0468581	6	0.85576	0.0474023	6	0.508587	0.0851796	6	0.536245	0.0765763	6
Figure 3 Figure supplement 1A: M3R-arrestin3 recruitment
ACh 30µM			Furmethiodide 50µM			Furmethiodide 30µM			Mda 100µM			Mda 150 µM
Mean	SD	N	Mean	SD	N	Mean	SD	N	Mean	SD	N	Mean	SD	N
1	0	10	0.800574	0.057929	10	0.771652	0.0539756	10	0.169066	0.0522623	13	0.164382	0.0337194	6
