# Supplementary material for: Disentangling bias between Gq, GRK2, and arrestin3 recruitment to the M3 muscarinic acetylcholine receptor
Source: eLife. 2021 Dec 1;10:e58442. doi: 10.7554/eLife.58442 (PMC8635974; doi:10.7554/eLife.58442)
Supplement: Figure 3—figure supplement 2—source data 1. [file elife-58442-fig3-figsupp2-data1.xlsx]

## Sheet: Tabelle1
Figure 3-Figure supplement 2A
	Acetylcholine			Arecoline			Guvacoline			Pilocarpine			Methacholine
Log[agonist](M)	Mean	SEM	N	Mean	SEM	N	Mean	SEM	N	Mean	SEM	N	Mean	SEM	N
-8	0.0301737	0.0162987	6
-7	0.126454	0.0310147	7							0.0486385	0.0113722	6
-6.60206													0.14599	0.0358586	6
-6.30103				0.0604876	0.0225514	5				0.173968	0.0160228	6	0.154124	0.0205698	6
-6	0.667825	0.0354999	6	0.112261	0.0202517	8	0.0772801	0.0177092	5	0.249215	0.0210828	6	0.273332	0.0202414	6
-5.30103				0.186716	0.0178214	8	0.228471	0.0238295	5	0.435096	0.0204984	6	0.594032	0.01596	6
-5	1.00763	0.0271451	6				0.292455	0.029659	5
-4.60206				0.282862	0.0136957	6	0.414472	0.0380429	5
-4.52288	1	0	7							0.516199	0.0177274	6	0.836098	0.0101284	6
-4.30103				0.335973	0.0147962	8	0.513116	0.0278737	5	0.507236	0.0214591	6	0.865133	0.0104741	6
-4							0.546453	0.0253958	5
-3.82391				0.348358	0.0135673	6
