# Supplementary material for: Disentangling bias between Gq, GRK2, and arrestin3 recruitment to the M3 muscarinic acetylcholine receptor
Source: eLife. 2021 Dec 1;10:e58442. doi: 10.7554/eLife.58442 (PMC8635974; doi:10.7554/eLife.58442)
Supplement: Figure 3—figure supplement 2—source data 2. [file elife-58442-fig3-figsupp2-data2.xlsx]

## Sheet: Tabelle1
Figure 3-Figure supplement 2B
	Acetylcholine			Arecoline			Guvacoline			Pilocarpine			Methacholine
Log[agonist](M)	Mean	SEM	N	Mean	SEM	N	Mean	SEM	N	Mean	SEM	N	Mean	SEM	N
-8.30103	0.0789634	0.0474546	5										0.0664916	0.0125778	5
-8	0.264497	0.0490679	5
-7.52288													0.384166	0.0253445	5
-7.30103	0.577524	0.0291282	6
-7	0.705625	0.0456957	5	0.16224	0.0336535	6				0.113298	0.0283604	6	0.543287	0.0347578	5
-6.60206							0.209234	0.0221151	5	0.258026	0.0247684	5
-6.30103				0.498575	0.0505162	6	0.340383	0.0217243	6	0.344238	0.0312589	6
-6	0.860187	0.0262888	5	0.593125	0.0450937	6	0.50268	0.0184842	7	0.442666	0.0278903	6
-5.30103				0.74324	0.0334896	6	0.696724	0.0126353	7	0.592204	0.0247708	6	0.881352	0.0206026	5
-5	0.981993	0.0107319	5
-4.52288	1	0	5				0.794972	0.0133171	6	0.600382	0.0232234	6	0.955037	0.0124177	5
-4.30103				0.803488	0.0178222	6	0.790908	0.00877421	7				0.948024	0.0120985	5
-4				0.790485	0.014549	6
