# Supplementary material for: Disentangling bias between Gq, GRK2, and arrestin3 recruitment to the M3 muscarinic acetylcholine receptor
Source: eLife. 2021 Dec 1;10:e58442. doi: 10.7554/eLife.58442 (PMC8635974; doi:10.7554/eLife.58442)
Supplement: Figure 3—figure supplement 2—source data 3. [file elife-58442-fig3-figsupp2-data3.xlsx]

## Sheet: Tabelle1
Figure 3-Figure supplement 2C:
		affinity
		Ki
	Arecoline	2.14714e-05
	Methacholine	1.27286e-05
	Pilocarpine	1.735e-06
	Guvacoline	2.66714e-05
	Furmethiodid	1.26143e-05
	Acetylcholine	7.46429e-06
Operational model calculation of tau:
			ACh	Metha	Are	Guva	Pilo	Fur
		M3_GRK	216.4	157.2	29.32	20.19	1.831
		M3_Arr	17.25	5.773	0.7726	1.713	1.06
		Gq_activation	1048	445.1	147.4	98.64	7.954	377.7
		delta tau gq	0	602.9	900.6	949.36	1040.05	670.3
log( tau/Ki)
			ACh	Metha	Are	Guva	Pilo	Fur
		M3_GRK	7.46227	7.09167	6.1353	5.87909	6.02339
		M3_Arr	6.3638	5.65662	4.55609	4.80771	5.78601
		Gq_activation	8.14737	7.54368	6.83664	6.56801	6.66129	7.47628
delta log( tau/Ki)
			ACh	Metha	Are	Guva	Pilo	Fur
		M3_GRK	0	0.370596	1.32697	1.58318	1.43888
		M3_Arr	0	0.707179	1.80771	1.55609	0.577794
		Gq_activation	0	0.603695	1.31074	1.57937	1.48609	0.671089
